# The general law of plasma proteome alterations occurring in the lifetime of Chinese individuals reveals the importance of immunity

Xiaolin Ni<sup>1,2,3</sup>, Juan Jiao<sup>4</sup>, Ze Yang<sup>1</sup>, Zhaoping Wang<sup>1</sup>, Nan Nan<sup>5</sup>, Danni Gao<sup>1</sup>, Liang Sun<sup>1</sup>, Xiaoquan Zhu<sup>1</sup>, Qi Zhou<sup>1</sup>, Nan Zhang<sup>1</sup>, Zhu Wu<sup>1</sup>, Shenqi Zhang<sup>6</sup>, Huiping Yuan<sup>1</sup>

<sup>1</sup>The Key Laboratory of Geriatrics, Beijing Institute of Geriatrics, Institute of Geriatric Medicine, Chinese Academy of Medical Sciences, Beijing Hospital, National Center of Gerontology of National Health Commission, Beijing 100730, China

<sup>2</sup>University of Chinese Academy of Sciences, Beijing 100049, China

<sup>3</sup>State Key Laboratory of Stem Cell and Reproductive Biology, Institute of Zoology, Institute for Stem Cell and Regeneration, Chinese Academy of Sciences, Beijing 100101, China

<sup>4</sup>Department of Clinical Laboratory, The Seventh Medical Center, Chinese PLA General Hospital, Beijing 100700, China

<sup>5</sup>Department of Cardiology, Beijing Anzhen Hospital, Capital Medical University, Chaoyang, Beijing 100029, China

<sup>6</sup>Department of Joint and Sports Medicine, Zaozhuang Municipal Hospital Affiliated to Jining Medical University, Shandong 277100, China

**Correspondence to:** Huiping Yuan; **email:** [yuanhuiping@126.com](mailto:yuanhuiping@126.com), <https://orcid.org/0000-0002-4018-7127>

**Keywords:** lifespan, proteomics, biological processes, immune system, aging

**Received:** May 26, 2022

**Accepted:** August 25, 2022

**Published:** September 7, 2022

**Copyright:** © 2022 Ni et al. This is an open access article distributed under the terms of the [Creative Commons Attribution License](https://creativecommons.org/licenses/by/3.0/) (CC BY 3.0), which permits unrestricted use, distribution, and reproduction in any medium, provided the original author and source are credited.

## ABSTRACT

**Background:** Aging is characterized by a continuous loss of protein homeostasis. A closer examination of peripheral blood, which houses proteins from nearly all tissues and cells, helped identify several biomarkers and other aspects of aging biology. To further explore the general law of aging and identify key time nodes and associated aging biology, we collected 97 plasma samples from 253 healthy individuals aged 0-100 years without adverse outcomes to conduct nano-Ultra High Performance Liquid Chromatography-Mass Spectrometry/Mass Spectrometry (nano-UHPLC-MS/MS) and weighted gene co-expression network analysis (WGCNA).

**Results:** Through biological processes and key biological pathways identified in discrete age group modules, our analyses highlighted a strong correlation between alterations in the immune system and aging process. We also identified hub genes associated with distinct age groups that revealed alterations not only in protein expression but also in signaling cascade. Among them, hub genes from age groups of 0-20 years old and 71-100 years old are mostly involved in infectious diseases and the immune system. In addition, CDC5L and HMGB2 were the key transcription factors (TFs) regulating genes expression in people aged between 51-60 and 71-100 years of age. They were shown to not only be independent but also mutually regulate certain hub gene expressions.

**Conclusions:** This study reveals that the plasma proteome undergoes a complex alteration over the lifetime of a human. In this process, the immune system is crucial throughout the lifespan of a human being. However, the underlying mechanism(s) regulating differential protein expressions at distinct ages remains to be elucidated.

## INTRODUCTION

With a global increase in life expectancy and a simultaneous decrease in fertility, aging is of great concern in China and the rest of the world [1]. The aging process is marked with a complex multifactorial decline in organ function, as well as emergence of multiple chronic diseases, which may synergistically bring about death [2, 3]. Thus far, aging was mostly studied in simple model organisms [4].

Proteins can directly modulate cellular signaling. Aging is characterized by a continuous loss of protein homeostasis marked by massive imbalances in protein compositions [5]. Multiple studies demonstrated that the protein profile in cells, bodily fluids, and tissues undergo vast alterations with age. This can provide insight into the complex regulation of aging and related biological processes. In particular, evaluations of the peripheral blood, which houses proteins from nearly all cells and tissues of the body, helped in the identification of numerous aging biomarkers as well as aging biology. Therefore, the protein profile in peripheral blood is representative of age-related alterations in various cells and tissues [3]. Conversely, multiple reports confirmed that soluble factors from young mouse blood can effectively reverse aging in older mice [6]. Proteins are critical executive molecules that convey biological information from the genes to the rest of the cells. Often times, a protein forms a complex with other protein(s) to transmit information in a signaling cascade [7]. Weighted gene co-expression network analysis (WGCNA) is a highly efficient evaluation tool that highlights the association between genetic networks and heterogeneous traits. This is often used in the identification of physiological and pathological biomarkers [8].

Hence, we conducted plasma proteomics investigation in different age groups, ranging from infants to nonagenarians, using WGCNA, in order to identify age-related alterations in protein profile and its effects on biological systems and pathways. We also hoped to find some key proteins that are essential to the aging process and identify age- and longevity- specific genes.

## RESULTS

### Baseline characteristic

Between 2020–2021, we recruited 253 healthy individuals, aged 0–100 years, with no adverse outcomes (such as, cardiovascular diseases, neurodegenerative diseases, and cancers) from the Beijing Hospital. We collected plasma from ethylenediaminetetraacetic acid (EDTA)-treated blood obtained via vein puncture.

Samples with poor plasma quality and incomplete basic information were excluded from the study. Next, we screened samples from each age group, which consisted of a compilation of 10 years (i.e., Age group 1: 0-10; Age group 2: 11-20; and so on). Finally, we selected 97 samples. Among them, 37 were males (38.14%) and 87 (89.69%) were Han Chinese (Table 1). These subjects were well matched in sex and ethnicity (Supplementary Table 1).

### Characterization of age-dependent protein expression

Mass spectrometry (MS)-based quantitative proteomics is a key technical method for protein identification and determination of the absolute or relative abundance of individual proteins [9]. In this study, we conducted MS quantitative proteomics based on Data-independent Acquisition (DIA). To quantify the proteomics data, peak strength of overall sample was calculated and normalized. Based on our analysis, the quantitative values distribution of the samples' peptide segments achieved basically the same response strength (Supplementary Figure 2A). We examined protein quantification of all samples via LC-MS/MS to further validate our quantification data. Based on our analysis, DIA was very repetitive for large samples (Supplementary Figure 2B), suggesting that our proteomics technique was accurate and precise. In total, we identified 2682 age-related proteins (89.28%), out of the 3004 total proteins in plasma (false discovery rate [FDR]-corrected  $p \leq 0.01$ ) (Supplementary Figure 2C). Following appropriate sample quality control (QC) and normalization procedures, we employed the Pearson correlation coefficients (PCC) to assess correlations among the 97 samples, based on proteomics data (2682 proteins). Apart from the A20-2 sample belonging to the Zhuang ethnic group, all PCCs between the technical replicates were relatively high, reaching mean of 0.97 (Supplementary Figure 2D).

### Construction of weighted gene co-expression network (WGCNA)

WGCNA was conducted identify co-expression modules and generate co-expression networks. To conduct proteomics analysis, 96 samples were divided into 10 groups (B1-B10), with each group representing a compilation of 10 years old, following the removal of sample A20-2. Next, based on the expression level of all proteins, 10 sets of samples were clustered hierarchically. We observed no strong outliers (Figure 1A). Next, we employed adequate soft-threshold validation, with convergence toward scale-free topology and mean connectivity, to select 6 common values as power values (Figure 1B). The Dynamic Tree Cut algorithm provided the first set of modules and this was combined with

**Table 1. Baseline characteristics of samples.**

| Age    | Mean±Std.  | Num | Male, n(%) | Han, n(%)  | State of health |
|--------|------------|-----|------------|------------|-----------------|
| 0-10   | 5.85±3.48  | 9   | 3(33.33)   | 6(66.67)   | Yes             |
| 11-20  | 14.80±3.43 | 10  | 4(40.00)   | 9(90.00)   | Yes             |
| 21-30  | 26.43±3.21 | 8   | 1(12.50)   | 7(87.50)   | Yes             |
| 31-40  | 35.40±2.84 | 10  | 3(30.00)   | 10(100.00) | Yes             |
| 41-50  | 44.60±2.32 | 10  | 5(50.00)   | 9(90.00)   | Yes             |
| 51-60  | 55.10±2.13 | 10  | 4(40.00)   | 9(90.00)   | Yes             |
| 61-70  | 64.80±3.46 | 10  | 6(60.00)   | 10(100.00) | Yes             |
| 71-80  | 75.70±3.74 | 10  | 3(30.00)   | 10(100.00) | Yes             |
| 81-90  | 85.22±2.64 | 10  | 4(40.00)   | 10(100.00) | Yes             |
| 91-100 | 95.60±2.84 | 10  | 4(40.00)   | 7(70.00)   | Yes             |
| Total  | -          | 97  | 37(38.14)  | 87(89.69)  | Yes             |

Std, standard deviation; Num/n, number.

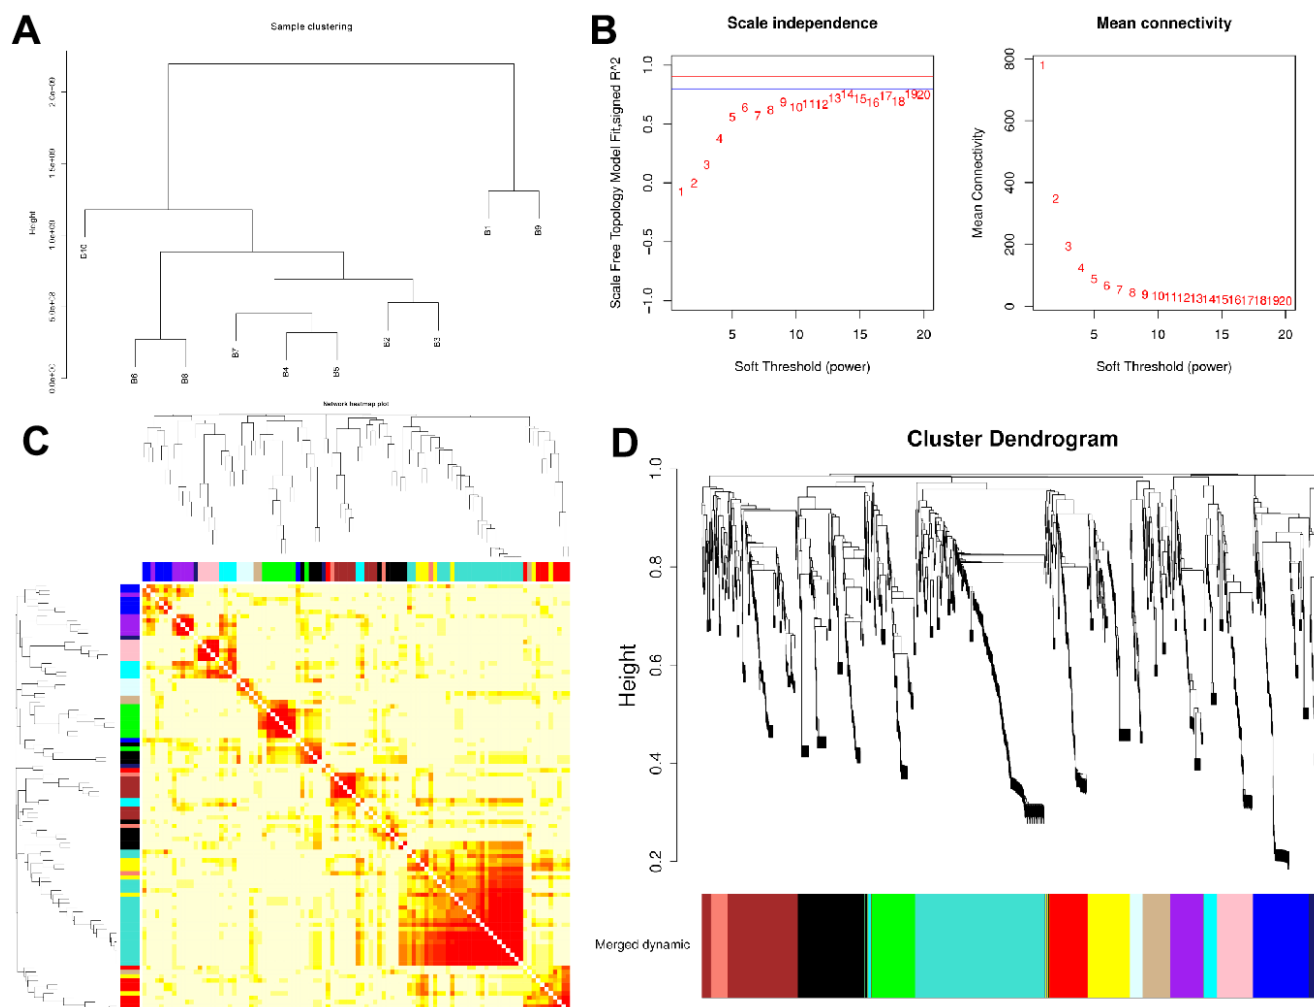

**Figure 1. Network construction of the weighted co-expressed genes and their associations with age.** (A) The Group hierarchical clustering tree. (B) Determination of soft-thresholding power. (C) The heatmap of genes correlation in modules. (D) Hierarchical clustering dendrograms (HCD) of modules. HCD using dynamic tree cut, depicting 14 plasma protein modules. Each branch of the HCD presents a single protein, and the colored bar below refers to its corresponding protein module. The HCD height is the distance between proteins.

associated modules ( $r > 0.7$ ; Merged dynamic). Each module contained at least 50 genes (Figure 1C and Supplementary Figures 3, 4). 14 modules were identified according to age (Figure 1D).

### Correlation between modules and aging

The gene co-expression in each module was summarized by Eigengene (i.e., the first component gene expression of each module). Next, we computed the relationship between each Eigengene and age group. As presented in Figure 2A and Supplementary Figure 5, the strongly correlated modules were different for each age group; for instance, the brown module represented 0-10 years old, the black module represented 11-20 years old, the purple module represented 21-30 years old, the pink module represented 31-40 years old, the midnight blue module represented 41-50 years old, the green module represented 51-60 years old, the lightcyan module represented 61-70 years old, the blue module represented 71-80 years old, the red module represented 81-90 years old, and the turquoise module represented 91-100 years old. In the meantime, the intramodular connectivity (K.in) and module correlation degree (MM) corresponding to each gene were computed and genes with high connectivity were assigned as potential hub genes with important functions. These results are presented in Supplementary Figures 6, 7.

### Functional enrichment analysis of critical modules

Next, we performed Gene Ontology (GO)-biological process (BP) and Kyoto Encyclopedia of Genes and Genomes (KEGG) enrichment analyses to elucidate the potential functional implications of proteins identified in the strongly correlated modules of each age group.

The top five BP-related GO terms from each age group demonstrated that the proteins were involved in complement activation, protein activation cascade, and immune response (GO:0006956, GO:0072376, GO:0002455) in the 0-10 years old (module brown); leukocyte mediated immunity (GO:0002443), immune response (GO:0006955), and cell activation (GO:0001775) in the 11-20 years old (module black); nucleosome or chromatin assembly (GO:0006334, GO:0031497) in the 21-30 years old (module purple); keratinization and epidermis development (GO:0031424, GO:0008544) in the 31-40 years old (module pink); regulation of receptor binding (GO:1900121, GO:1900120), heart trabecula morphogenesis (GO:0061384), negative regulation of molecular function or high-density lipoprotein particle clearance (GO:0044092, GO:0010987) in the 41-50 years old (module midnight blue); exocytosis (GO:0045055, GO:0006887) and vesicle-mediated transport (GO:0016192) in the 51-60 years old (module green);

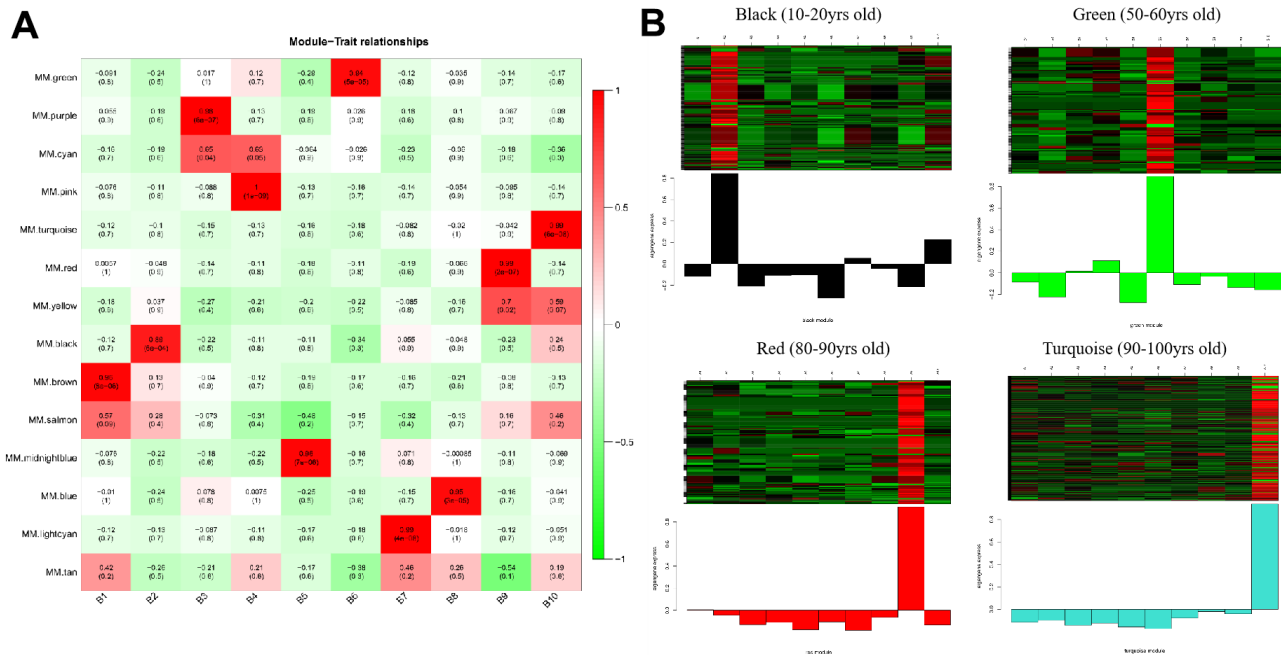

**Figure 2. Heatmaps of age-related modules and the clustering of some critical module eigengene. (A)** Heatmaps of the correlation between Eigengene and clinical traits of age. Each row corresponds to a module eigengene, and each column corresponds to an age group. Each cell contains the corresponding correlation and p-value. **(B)** The clustering of four module eigengenes (black, green, red and turquoise).

keratinization (GO:0031424, GO:0030216) in the 61-70 years old (module lightcyan); platelet degranulation or activation (GO:0002576, GO:0030168) in the 71-80 years old (module blue); protein activation cascade, complement activation, and immune response (GO:0072376, GO:0006956, GO:0002455, GO:0002250, GO:0006958) in the 81-90 years old (module red); chromatin silencing, epigenetic, and immune system process (GO:0006342, GO:0045814, GO:0000183, GO:0002376) in the 91-100 years old (module turquoise) (Figure 3A and Supplementary Table 3).

We also identified enriched pathways using KEGG enrichment analysis. Based on our analysis, infectious diseases (ko05150) were the most significantly enriched KEGG pathway, followed by transport and catabolism (ko04145) in the 0-10 years old (module brown). With the development of the body, signaling molecules and interaction (ko04512) with environmental information began to play key roles among the 11-20 years old (module black). The purple module, corresponding to the 21-30 years old, showed significant enrichment of pathways involved in human diseases, such as, immune diseases, cancers and substance dependence (ko05322, ko05203, ko05034). Subsequently, proteins were enriched in development and immune system (ko04380, ko04662) in the 31-40 years old (module pink), followed by infectious diseases (ko05146, ko05150) and digestive system (ko04976) in the 41-50 years old (module midnight blue). In the middle-aged and old stages [10] (51-60 years old, module green and 61-70 years old, module lightcyan), the proteins were significantly enriched in carbohydrate metabolism

(ko00030, ko00010), transport, catabolism (ko04145, ko04144), and immune system (ko04666). These alterations implied that the cellular processes and metabolism were mobilized throughout the body. As the aging process continued, the proteins significantly enriched in cell motility and cellular community of cellular processes (ko04810, ko04510, ko04520), infectious diseases and cardiovascular diseases of human diseases (ko05131, ko05414) in the 71-80 years old (module blue). Next, proteins were enriched in immune and infectious diseases (ko05150, ko05143, ko05322, ko05146, ko05310) in the 81-90 years old (module red). Finally, in individuals over 90 years old, proteins were enriched in immune diseases, substance dependence, and cancers (ko05322, ko05034, ko05202; module turquoise; Figure 3B and Supplementary Table 4). Notably, the >90 age group was enriched in the same pathways as the 21-30 age group, however, the genes involved were different.

### The pathway crosstalk analysis of critical modules

Based on the overall analysis over an average lifespan, we performed pathway crosstalk analysis among the critical module in each age group. Notably, these modules were not independent, as they shared certain common pathways, for example, phagosome (ko04145), pentose phosphate pathway (ko00030), staphylococcus aureus infection (ko05150). All pathways in these modules formed two major clusters (Figure 3C). One cluster consisted of the pentose phosphate pathway and glycolysis/gluconeogenesis and involved the module green and lightcyan. The other cluster was more complex

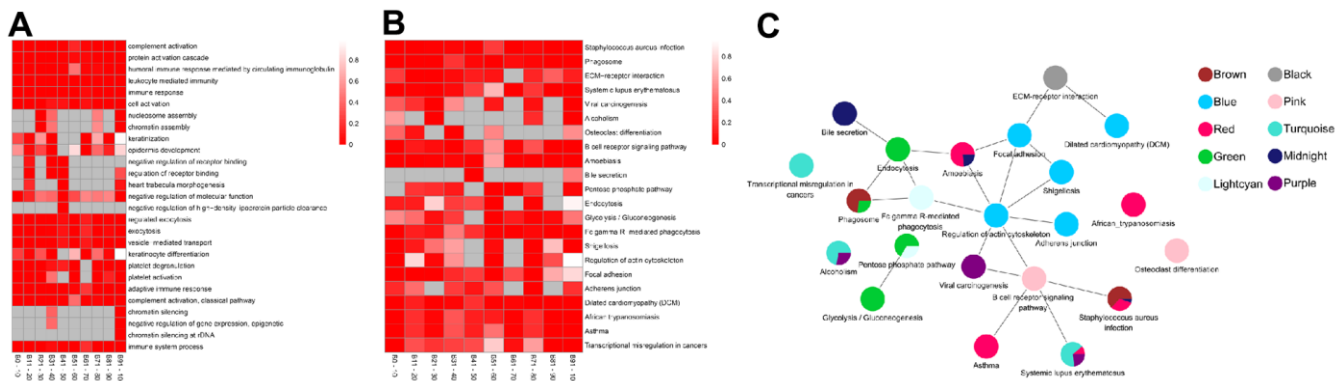

**Figure 3. The top enrichment of Gene Ontology (GO)-biological progress (BP) and Kyoto Encyclopedia of Genes and Genomes (KEGG) pathway in each age groups. (A)** The leading five enrichment data of GO-BP analysis. Differential genes (Genes) are distributed across multiple GO biological progress. Each row corresponds to the top five enriched pathways, and each column corresponds to an age group. The color represents P value and the smaller the P value, the color becomes darker (red). no enrichment to no color (White). There is no color (grey) without enrichment. **(B)** Top ten enrichment results of the KEGG pathway. Genes are involved in a wide range of KEGG. Each row corresponds to top ten enriched pathways, and each column corresponds to an age group. The color represents P value and the smaller the P value, the more obvious enrichment, the darker color (red), and no enrichment to no color (White). There is no color (grey) without enrichment. **(C)** The pathway crosstalk analysis of critical modules. The color of nodes denotes modules.

and formed connections with all critical modules. Interestingly, most of the signaling pathways in these clusters were related to immunity. Viral carcinogenesis, which was ranked as the topmost node (20 nodes) and most interactive, can serve critical roles in the progression of life. These results demonstrate that immunity is important throughout life.

### Identifying hub genes in the critical module

Furthermore, we generated a protein-protein interactions (PPI) network of proteins in the critical module of each age group (Table 2 and Supplementary Figure 8) to recognize chief hub genes associated with aging.

The all-connective genes in the ten modules were individually uploaded to STRING for PPI evaluation (Supplementary Figure 8). In all, the node scores ranged from 0.400 to 0.999. Using the PPI data, we were also able to establish the co-expression coefficient of different proteins. Based on the high connectivity of genes in each module, the elevated combined scores (CS; value > 0.9) and elevated co-expression coefficients (CEC; value > 0.8) suggested that protein-protein interactions dictate spatial protein positioning and gene expression within cells. We further analyzed the genes in relation to our previously identified hub genes in each age group. The molecular functions of all candidate hub genes are listed in Table 2. And, elevated CS (value > 0.9), but reduced CEC (value = 0) suggests that the protein-protein interaction not only regulates gene expression, but also signaling cascade (Supplementary Table 5).

Based on our results, there were forty hub genes in the module brown, black, green, blue, red, and turquoise with elevated CS combined scores (value > 0.9) and elevated CEC (value > 0.8) (Table 3). The proteins in these modules represented strong correlation with the corresponding age groups (Figure 4A). Interestingly, hub genes from age groups of 0-20 years old and 71-100 years old, namely, ARPC2, UBB, FGB, and FGG, are mostly involved in infectious diseases and the immune system. In contrast, the hub genes from the age groups of 51-60 years old, namely, ADH1A, PGD, and TALDO1, are mainly associated with carbohydrate metabolism (Table 3 and Supplementary Table 6).

### Construction of the transcription factor (TF) regulatory network

We further investigated the molecular mechanisms that regulate hub genes. We employed the Network Analyst tool to predict TFs that regulate expression of the forty hub genes. Based on our analysis, the TFs CDC5L and

HMGB2 modulated the expressions of ADH1A, ARPC4, PGD, HSPA5, APOA1, ITIH2, APOA2, TPT1, FGB, F2, FGG, ACTC1, and ACTBL2 genes (Figure 4B) in the 51-60 years old and 71-100 age groups (modules blue, green, red, and turquoise). In addition, PCC analysis revealed that CDC5L was positively correlated with ADH1A, ACTC1, APOA1, ITIH2, and FGG expressions, whereas, HMGB2 was positively correlated with ARPC4, PGD, HSPA5, APOA1, ITIH2, APOA2, TPT1, FGB, F2, and ACTBL2 expressions.

## DISCUSSION

Using extensive plasma proteome analysis, we identified several undulating protein alterations that occur at different stages of a human lifetime (Supplementary Figure 5). We further aggregated these Genes into clusters within distinct age groups or modules. In addition, we analyzed the biological processes and key biological pathways of each age group/module, and revealed some interesting patterns associated with aging. Moreover, we demonstrated that the immune system plays a crucial role in all age groups.

Based on our analysis, from birth to ten years of age, proteins were mainly enriched in complement activation, protein activation cascade, and immune response (GO:0006956, GO:0072376, GO:0002455, GO:0006958, GO:0006959). It is well known that complement is a key component of the innate immune reference and it forms a gateway to adaptive immune responses [11]. In particular, invasive bacterial infections in childhood are strongly related to significant morbidity and death [12], indicating that the body's response to the external environment must be the main physiological activity in young children. This is in line with the characteristics of infants and young children who adapt to changes in the external environment (ko05150) and simultaneously carry out their own material transport and catabolism (ko04145). With strong adaptation to the external environment, the immune response remains the main biological process and exerts its action via signaling molecules and interaction (ko04512) with environmental information in 11-20 years old.

In ages 21-30 years old, proteins were mostly enriched in nucleosome assembly, chromatin assembly, and nucleosome organization (GO:0006334, GO:0031497, GO:0034728), involving human diseases like immune diseases, cancers, and substance dependence (ko05322, ko05203, ko05034). Prior reports revealed that substance dependence is a chronic relapsing brain disorder caused by alterations in synaptic resilience and neuronal activities. It is also a common cause of adolescent morbidity and mortality in the United States [13, 14].

**Table 2. The leading 10 expressed genes in the critical module of each age group.**

| Module       | Connectivity | Symbol    | Description                                                     |
|--------------|--------------|-----------|-----------------------------------------------------------------|
| brown        | 91.829       | FAP       | fibroblast activation protein alpha                             |
| brown        | 90.954       | IGLV4-3   | immunoglobulin lambda variable 4-3                              |
| brown        | 87.384       | DPEP2     | dipeptidase 2                                                   |
| brown        | 87.381       | COL11A2   | collagen type XI alpha 2 chain                                  |
| brown        | 87.381       | TIE1      | tyrosine kinase with immunoglobulin like and EGF like domains 1 |
| brown        | 87.381       | GPX1      | glutathione peroxidase 1                                        |
| brown        | 87.381       | NOTCH2    | notch receptor 2                                                |
| brown        | 87.381       | CLIC4     | chloride intracellular channel 4                                |
| brown        | 86.847       | HK1       | hexokinase 1                                                    |
| brown        | 85.653       | SPP2      | secreted phosphoprotein 2                                       |
| black        | 76.444       | KRT14     | keratin 14                                                      |
| black        | 74.998       | CLIC1     | chloride intracellular channel 1                                |
| black        | 69.874       | KRT17     | keratin 17                                                      |
| black        | 69.685       | HPD       | 4-hydroxyphenylpyruvate dioxygenase                             |
| black        | 69.684       | LAP3      | leucine aminopeptidase 3                                        |
| black        | 69.684       | EEF2      | eukaryotic translation elongation factor 2                      |
| black        | 69.683       | FLT4      | fms related receptor tyrosine kinase 4                          |
| black        | 69.683       | LEP       | leptin                                                          |
| black        | 68.911       | COL6A1    | collagen type VI alpha 1 chain                                  |
| black        | 68.851       | CTSS      | cathepsin S                                                     |
| purple       | 55.565       | H2BC      | H2B clustered histone                                           |
| purple       | 55.523       | FLNA      | filamin A                                                       |
| purple       | 51.639       | PDIA3     | protein disulfide isomerase family A member 3                   |
| purple       | 49.128       | HSPD1     | heat shock protein family D (Hsp60) member 1                    |
| purple       | 47.543       | IGFBP5    | insulin like growth factor binding protein 5                    |
| purple       | 46.371       | FGL2      | fibrinogen like 2                                               |
| purple       | 45.153       | ITGA6     | integrin subunit alpha 6                                        |
| purple       | 42.211       | PGAM1     | phosphoglycerate mutase 1                                       |
| purple       | 39.598       | ITGA2     | integrin subunit alpha 2                                        |
| purple       | 39.529       | CHGA      | chromogranin A                                                  |
| pink         | 72.830       | KRTAP3-2  | keratin associated protein 3-2                                  |
| pink         | 72.830       | LILR      | leukocyte immunoglobulin like receptor                          |
| pink         | 72.830       | KRTAP     | keratin associated protein 9-8                                  |
| pink         | 72.830       | CCS       | copper chaperone for superoxide dismutase                       |
| pink         | 72.830       | KRTAP13-1 | keratin associated protein 13-1                                 |
| pink         | 72.788       | KRTAP3-3  | keratin associated protein 3-3                                  |
| pink         | 72.673       | KRTAP13-4 | keratin associated protein 13-4                                 |
| pink         | 72.348       | KRT34     | keratin 34                                                      |
| pink         | 72.022       | KRTAP11-1 | keratin associated protein 11-1                                 |
| pink         | 69.581       | KRT85     | keratin 85                                                      |
| midnightblue | 28.401       | CTSH      | cathepsin H                                                     |
| midnightblue | 24.610       | ENG       | endoglin                                                        |
| midnightblue | 23.752       | SLCO1B3   | solute carrier organic anion transporter family member 1B3      |
| midnightblue | 19.424       | CHL1      | cell adhesion molecule L1 like                                  |
| midnightblue | 17.789       | LAMB1     | laminin subunit beta 1                                          |
| midnightblue | 15.307       | IGKV3     | immunoglobulin kappa variable 3                                 |
| midnightblue | 12.843       | PTPRF     | protein tyrosine phosphatase receptor type F                    |
| midnightblue | 11.532       | RAB7A     | RAB7A, member RAS oncogene family                               |
| midnightblue | 11.048       | APOC3     | apolipoprotein C3                                               |
| midnightblue | 9.966        | RNPEP     | arginyl aminopeptidase                                          |
| green        | 69.600       | CORO1C    | coronin 1C                                                      |
| green        | 66.963       | NME2      | NME/NM23 nucleoside diphosphate kinase 2                        |

|           |         |            |                                                                            |
|-----------|---------|------------|----------------------------------------------------------------------------|
| green     | 66.713  | RAP1B      | RAP1B, member of RAS oncogene family                                       |
| green     | 65.605  | RTN4       | reticulum 4                                                                |
| green     | 65.236  | ADH1       | alcohol dehydrogenase 1                                                    |
| green     | 64.406  | RAB6B      | RAB6B, member RAS oncogene family                                          |
| green     | 63.888  | DPP3       | dipeptidyl peptidase 3                                                     |
| green     | 60.382  | CAP1       | cyclase associated actin cytoskeleton regulatory protein 1                 |
| green     | 58.831  | UBE2L5     | ubiquitin conjugating enzyme E2 L5                                         |
| green     | 58.221  | LTA4H      | leukotriene A4 hydrolase                                                   |
| lightcyan | 28.009  | VASP       | vasodilator stimulated phosphoprotein                                      |
| lightcyan | 27.971  | KRT82      | keratin 82                                                                 |
| lightcyan | 22.800  | WRAP73     | WD repeat containing, antisense to TP73                                    |
| lightcyan | 22.141  | GTF3C3     | general transcription factor IIIC subunit 3                                |
| lightcyan | 21.035  | KRT36      | keratin 36                                                                 |
| lightcyan | 19.421  | RNH1       | ribonuclease/angiogenin inhibitor 1                                        |
| lightcyan | 19.390  | H6PD       | hexose-6-phosphate dehydrogenase/glucose 1-dehydrogenase                   |
| lightcyan | 19.028  | CA6        | carbonic anhydrase 6                                                       |
| lightcyan | 16.826  | GSTO1      | glutathione S-transferase omega 1                                          |
| lightcyan | 16.259  | C1orf56    | chromosome 1 open reading frame 56                                         |
| blue      | 93.696  | MDH1       | malate dehydrogenase 1                                                     |
| blue      | 91.610  | IGF2R      | insulin like growth factor 2 receptor                                      |
| blue      | 90.917  | COL1A2     | collagen type I alpha 2 chain                                              |
| blue      | 90.890  | APP        | amyloid beta precursor protein                                             |
| blue      | 90.882  | PAFAH1B2   | platelet activating factor acetylhydrolase 1b catalytic subunit 2          |
| blue      | 90.880  | PSMA1      | proteasome 20S subunit alpha 1                                             |
| blue      | 90.880  | AC018523.2 | novel protein                                                              |
| blue      | 90.879  | CCL5       | C-C motif chemokine ligand 5                                               |
| blue      | 90.879  | ANGPTL6    | angiopoietin like 6                                                        |
| blue      | 90.878  | CYCS       | cytochrome c, somatic                                                      |
| red       | 72.930  | ECI1       | enoyl-CoA delta isomerase 1                                                |
| red       | 72.929  | PIP        | prolactin induced protein                                                  |
| red       | 71.924  | EP400      | E1A binding protein p400                                                   |
| red       | 71.675  | PRR16      | proline rich 16                                                            |
| red       | 71.605  | MYZAP      | myocardial zonula adherens protein                                         |
| red       | 71.605  | GCOM1      | GRINL1A complex locus 1                                                    |
| red       | 65.762  | AMY        | amylase alpha                                                              |
| red       | 62.372  | KPRP       | keratinocyte proline rich protein                                          |
| red       | 59.745  | KRT9       | keratin 9                                                                  |
| red       | 58.541  | IGKV2D-24  | immunoglobulin kappa variable 2D-24 (non-functional)                       |
| turquoise | 202.101 | HMBS       | hydroxymethylbilane synthase                                               |
| turquoise | 202.101 | GKN1       | gastrokine 1                                                               |
| turquoise | 202.100 | H3         | H3                                                                         |
| turquoise | 202.100 | TPT1       | tumor protein, translationally-controlled 1                                |
| turquoise | 202.100 | LGALS7B    | galectin 7B                                                                |
| turquoise | 202.100 | SVEP1      | sushi, von Willebrand factor type A, EGF and pentraxin domain containing 1 |
| turquoise | 202.100 | PGM2       | phosphoglucomutase 2                                                       |
| turquoise | 202.100 | SSC5D      | scavenger receptor cysteine rich family member with 5 domains              |
| turquoise | 202.100 | SPINK1     | serine peptidase inhibitor Kazal type 1                                    |
| turquoise | 202.099 | MYL1       | myosin light chain 1                                                       |

The National Cancer Institute defines cancer amongst adolescents and young adults (AYAs) as a unique form of cancer affecting 15 to 39 years old. Multiple evidences suggest that AYA tumors are molecularly distinct, relative to cancers in other age groups [15]. Our

results also revealed that although the proteins in the 21-30 and 91-100 age groups enriched in the same disease pathways, the genes involved were vastly different. For instance, H2B clustered histone was more prevalent in 21-30 years old, whereas H3 clustered histone was more



**Table 3. The protein–protein interaction (PPI) analysis of hub genes in different modules.**

| Age groups      | Module   | Node1            | Node2     | Node1 connectivity | Node2 connectivity | Coexpression | Combined score |
|-----------------|----------|------------------|-----------|--------------------|--------------------|--------------|----------------|
| 0-10 years old  | brown    | ARPC2            | ARPC5     | 16.766             | 18.201             | 0.946        | 0.999          |
|                 |          | DDX39B           | HNRNPA2B1 | 49.029             | 66.056             | 0.950        | 0.970          |
|                 |          | DDX39B           | HNRNPK    | 49.029             | 64.876             | 0.951        | 0.960          |
| 11-20 years old | black    | EEF2             | UBA52     | 69.684             | 54.320             | 0.924        | 0.999          |
|                 |          | HNRNPA2B1        | HNRNPK    | 66.056             | 64.876             | 0.953        | 0.998          |
|                 |          | RPS27A           | UBA52     | 54.320             | 54.320             | 0.935        | 0.999          |
|                 |          | UBB              | UBC       | 54.320             | 54.320             | 0.858        | 0.998          |
|                 |          | ADH1A            | ADH1B     | 65.236             | 65.236             | 0.828        | 0.982          |
| 51-60 years old | green    | ARPC3            | ARPC4     | 22.205             | 24.819             | 0.999        | 0.999          |
|                 |          | PGD              | TALDO1    | 8.834              | 4.664              | 0.863        | 0.990          |
|                 |          | ACTB             | ACTC1     | 25.966             | 57.476             | 0.948        | 0.984          |
| 71-80 years old | blue     | ACTB             | ACTBL2    | 25.966             | 52.264             | 0.946        | 0.946          |
|                 |          | ACTBL2           | ACTC1     | 52.264             | 57.476             | 0.939        | 0.939          |
|                 |          | COL1A1           | COL1A2    | 16.749             | 90.917             | 0.991        | 0.999          |
| 81-90 years old | red      | CALR             | HSPA5     | 14.716             | 13.575             | 0.881        | 0.998          |
|                 |          | AHSG             | APOA1     | 72.648             | 48.668             | 0.918        | 0.996          |
|                 |          | AHSG             | FGA       | 72.648             | 45.072             | 0.835        | 0.989          |
|                 |          | AHSG             | F2        | 72.648             | 50.781             | 0.959        | 0.973          |
|                 |          | AHSG             | FGG       | 72.648             | 48.344             | 0.864        | 0.991          |
|                 |          | AHSG             | ITIH2     | 72.648             | 132.353            | 0.841        | 0.990          |
|                 |          | AHSG             | SERPINC1  | 72.648             | 58.881             | 0.807        | 0.987          |
|                 |          | AHSG             | APOA2     | 72.648             | 48.962             | 0.918        | 0.995          |
|                 |          | APOA1            | APOA2     | 48.668             | 48.962             | 0.902        | 0.999          |
|                 |          | APOM             | FGB       | 28.989             | 45.765             | 0.919        | 0.931          |
|                 |          | C1QB             | VSIG4     | 28.621             | 11.071             | 0.955        | 0.967          |
|                 |          | EEF1B2           | TPT1      | 46.912             | 202.100            | 0.886        | 0.973          |
|                 |          | 91-100 years old | turquoise | F2                 | FGA                | 50.781       | 45.072         |
| F2              | FGG      |                  |           | 50.781             | 48.344             | 0.811        | 0.998          |
| F2              | SERPINC1 |                  |           | 50.781             | 58.881             | 0.815        | 0.999          |
| FETUB           | ITIH2    |                  |           | 19.827             | 132.353            | 0.916        | 0.939          |
| FGA             | FGB      |                  |           | 45.072             | 45.765             | 0.992        | 0.999          |
| FGA             | ITIH2    |                  |           | 45.072             | 132.353            | 0.845        | 0.985          |
| FGA             | SERPINC1 |                  |           | 45.072             | 58.881             | 0.925        | 0.996          |
| FGA             | FGG      |                  |           | 45.072             | 48.344             | 0.993        | 0.999          |
| FGB             | SERPINC1 |                  |           | 45.765             | 58.881             | 0.838        | 0.991          |
| FGB             | FGG      |                  |           | 45.765             | 48.344             | 0.992        | 0.999          |
| FGG             | ITIH2    |                  |           | 48.344             | 132.353            | 0.886        | 0.989          |
| FGG             | SERPINC1 |                  |           | 48.344             | 58.881             | 0.907        | 0.995          |
| ITIH2           | SERPINC1 |                  |           | 132.353            | 58.881             | 0.922        | 0.994          |

active in the 91-100 years old. The active biological processes in the 91-100 years old age group involved chromatin silencing and negative regulation of gene expression (GO:0006342, GO:0045814), which were also different from the 21-30 years old. However, the

specific mechanisms that make people vulnerable to these diseases need to be further explored.

In the 31-40 years old, keratinization and epidermis development (GO:0031424, GO:0008544) were

important factors in maintaining immunity. The epidermis is the outer layer of the skin. It is in direct contact with the external environment, it protects our body from dehydration, and prevents xenobiotic penetration or infection of the organism. It is also representation of our health and of what is going on inside the body [16]. In our study, once the age reached 40 years old, organs and body molecules began to change gradually, such as, heart trabecula morphogenesis, high-density lipoprotein (HDL) particle clearance (GO:0061384, GO:0010987), indicating the gradual increase of internal regulation in the organism. In the middle-aged and old stages [10] (51-70 years old), proteins were mostly enriched in the carbohydrate metabolism, transport, and catabolism processes (ko00030, ko04145, ko04144, ko00010). Recent studies revealed that a low-protein and high-carbohydrate diet strongly regulates longevity and metabolic health [17]. Geometric Framework examinations on insects and mice demonstrated that diets low in protein and high in carbohydrates produce the longest lifespans in ad libitum-fed animals [18]. In particular, hub genes, such as, ADH1A, PGD, and TALDO1, in the module green (51-60 years old) are also mainly associated with carbohydrate metabolism (Table 3). ADH1A (alcohol dehydrogenase 1A) catalyze alcohol oxidation to aldehydes. Zahid et al. suggested that higher ADH1A expression is associated with good survival and a less aggressive disease state in hepatocellular carcinoma patients [19]. 6-phosphogluconate dehydrogenase (PGD) is a cytosolic enzyme involved in carbohydrate

metabolism [20]. A review reported that 6PGD deficiency reduced lipogenesis and RNA production while increasing ROS expression in cancer cells, thus suppressing cell proliferation and tumour growth [21]. TALDO1 (Transaldolase 1) is a chief enzyme belonging to the nonoxidative pentose phosphate pathway that provides ribose-5-phosphate for nucleic acid generation and NADPH for lipid biosynthesis. TALDO is clinically related to carbohydrate metabolism, and involves multiple organ systems, such as, breast, liver, pancreas, kidney and heart [22]. Our results demonstrated that in 51-60 years old, there is a strong relationship between these genes (ADH1A, PGD and TALDO1), carbohydrate metabolism, and health in general. Thus, we speculated that the middle- and old ages may be a critical period for the metabolism-mediated regulation of longevity in humans. With the development of the body's aging process (71-90 years old), the occurrence risk of immune, infectious, and cardiovascular diseases increases. Multiple studies of cardiovascular diseases revealed that the adaptive immune response plays a crucial role in a wide range of cardiovascular disorders [23]. With increasing age, immunologic activities decline in a process called immunosenescence. This decline in immune activity causes higher incidences and severity of infectious and cardiovascular diseases in elderly persons [23, 24]. Therefore, although the biological process (GO:0072376, GO:0006956, GO:0002455, GO:0002250, GO:0006958) of proteins enrichment in the 81-90 years old was similar to that of infants and young children, it may be caused by

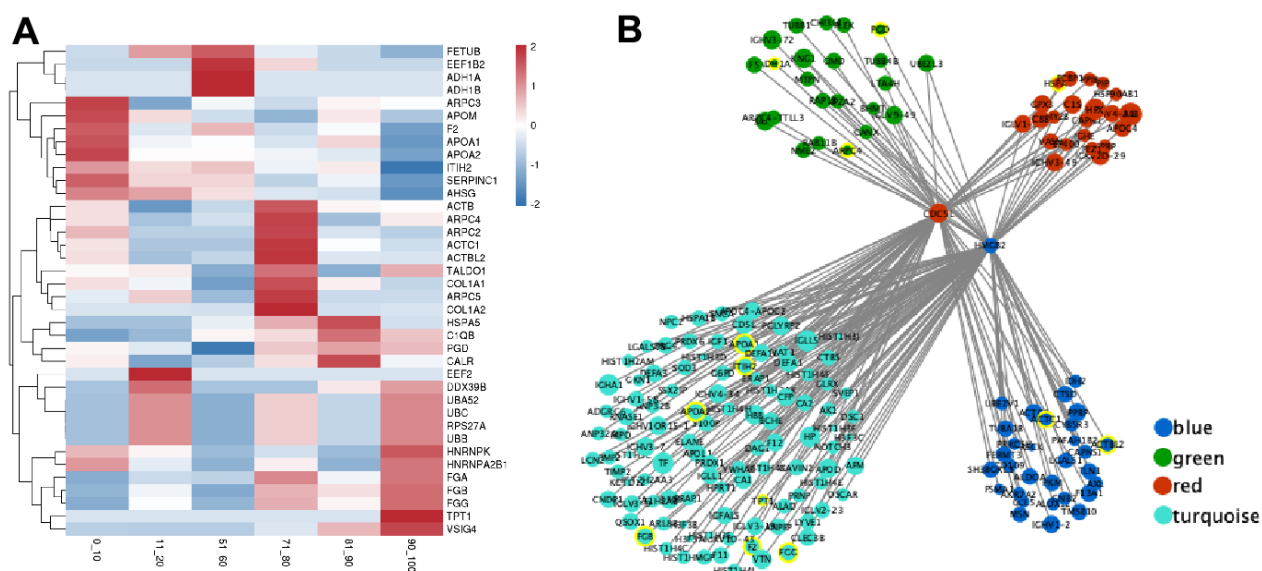

**Figure 4. The expression of hub genes and transcription factor (TF) regulatory network in the critical module. (A)** The expression heatmap of hub gene. **(B)** The interaction regulatory network of TF and target genes. The core circles are two transcription factors (CDC5L and HMGB2). The surrounding circles represent their target genes, the color represents the source module, the circle size represents the expression, and the yellow circle represents the hub gene.

immunosenescence, not immature immune cells, according to previous researches and literature reports.

TFs are special protein molecules that can bind to specific DNA sequences and influence gene expression [25]. Here, for the first time, we demonstrated that CDC5L and HMGB2 are key TFs regulated genes in the age groups 51-60 and 71-100 years. Studies revealed that the cell division cycle 5-like (CDC5L) protein modulates the G2/M transition and participates in the catalytic stage of pre-messenger RNA (mRNA) splicing and DNA damage repair [26]. High-mobility group box (HMGB)2 protein is involved in DNA replication, repair, transcription, differentiation, proliferation, cell signaling, inflammation, and tumor migration [27]. In our study, CDC5L and HMGB2 were shown to not only be independent but also mutually regulate certain hub gene expressions (Figure 4B), namely, it regulated the pentose phosphate pathway (ko00030) and glycolysis/gluconeogenesis (ko00010) in carbohydrate metabolism, dilated cardiomyopathy (DCM) (ko05414) associated with cardiovascular diseases, as well as complement and coagulation cascades (ko04610) and staphylococcus aureus infection (ko05150) in the immune system (Supplementary Table 4). CDC5L and HMGB2 may play different roles at different ages.

Although we found some interesting regular patterns with ageing for the first time, especially the immune system throughout the whole life phase. Additionally, large-scale population validation and experimental validation in cell or animal models are still needed. Meanwhile, a special-purpose questionnaire survey on the subjects in terms of lifestyle which may alter plasma proteomic expression levels will also need to conduct in the future.

## CONCLUSION

Here, using WGCNA, we identified clusters of proteins distributed across distinct modules. The results from this study demonstrated that the plasma proteome undergoes a complicated alteration over the lifetime of a human being. In-depth analyses of age-related proteins revealed significant biological processes and key biological pathways within each age group/module, and identified some interesting regular patterns associated with aging, namely the immune system, which is crucial throughout the lifespan of a human being. We also identified distinct hub genes corresponding to different ages. Among them, hub genes are mostly involved in carbohydrate metabolism at the age groups of 51-60 years old which may be a critical period for the metabolism-mediated regulation of longevity in humans. In addition, we highlighted CDC5L and HMGB2 as key TFs regulating gene expression in the

51-60 and 71-100 years old people. However, the specific mechanisms whereby genes modulate target biological processes at different ages need to be further explored.

## MATERIALS AND METHODS

### Subjects

Samples in this study were selected from 253 healthy individuals, aged 0–100 years, without infectious diseases and adverse outcomes like cardiovascular diseases, neurodegenerative diseases, and cancers. We collected plasma from EDTA-treated blood obtained via vein puncture. According to the inclusion / exclusion criteria (inclusion criteria: 0-100 years old, healthy individuals with complete basic information; exclusion criteria: 0-100 years old, with infection or major chronic diseases, or with incomplete basic information), 153 individuals were screened out. Finally, we selected 97 samples (37 males and 60 females, 87 Han Chinese and 10 other Ethnic Groups) according to the principle of 10-year-old group (i.e., Age group 1: 0-10; Age group 2: 11-20; and so on), equal distribution of sample number and gender (Table 1). Subjects in the ten groups were well matched in sex and ethnic by chi-square test (Supplementary Table 1). We received informed consent from all subjects and their guardians, retrieved detailed information about this research and any risks associated with it before subject recruitment. Our protocols followed the Declaration of Helsinki and received approval from the ethical board at Beijing Hospital, Ministry of Health (2019BJYYEC-118-02).

### Sample pretreatment for plasma proteome profiling using DIA MS

The plasma sample (20  $\mu$ L for serum sample) was diluted with 1% SDS in 8 M urea buffer 40 times and allowed to lyse on ice for 30 min, while vortexing the tube every 10 min. The soluble protein lysates were then centrifuged at 12000 g for 20 min at 4° C and the accumulated protein quantified with a BCA protein assay (Supplementary Figure 1 and Supplementary Table 2). Next, 100  $\mu$ g of protein was placed in a fresh Eppendorf tube with 8 M urea at a total volume to 100  $\mu$ L. 2  $\mu$ L of 0.5 M TCEP was then introduced and the sample maintained at 37° C for 1 h, before addition of 4  $\mu$ L of 1 M iodoacetamide and maintenance in the dark at room temperature (RT) for 49 min. Following this, 5 volumes of -20° C pre-chilled acetone was employed for overnight (ON) protein precipitation at -20° C. The precipitated protein was then rinsed with pre-chilled 90% acetone aqueous solution two times before re-suspension in 100  $\mu$ L 100 mM TEAB. This was followed by the addition of Sequence grade modified

trypsin (Promega, Madison, WI; ratio 1:50, enzyme: protein, weight: weight) for ON protein digestion at 37° C. The peptide mixture was then desalted using C18 ZipTip, measured with Pierce™ Quantitative Colorimetric Peptide Assay (23275), and lyophilized using SpeedVac.

### High PH reverse phase separation

The peptide mixture was re-suspended in 20mM ammonium formate in water, pH brought up to 10.0 with ammonium hydroxide. Next, it underwent fractionation via high pH separation using Ultimate 3000 system (Thermo Fisher Scientific, MA, USA) attached to a reverse phase column (XBridge C18 column, 4.6mm x 250 mm, 5µm, (Waters Corporation, MA, USA). It employed a linear gradient from 5-45% in 40 min of 20mM ammonium formate in 80% ACN, pH brought up to 10.0 with ammonium hydroxide. Column re-equilibration was done for 15 min to bring it back to the starting condition. The column flow rate (CFR) and temperature (CT) remained at 1mL/min and 30° C, respectively. We collected a total of ten fractions, each of which was vacuum-concentrated for subsequent analysis (Guangzhou Gene Denovo Bio-Tech Co., Ltd., China).

### DDA: Nano-HPLC-MS/MS analysis

The peptides were re-suspended in 30 µL 0.1% formic acid in water and assessed via on-line nanospray LC-MS/MS on an Orbitrap Fusion Lumos coupled to EASY-nLC 1200 system (Thermo Fisher Scientific, MA, USA). 3 µL peptide was introduced to the analytical column (Acclaim PepMap C18, 75 µm x 25 cm) and peptide separation was done with a 120-min gradient spanning 5-35% concentration of 0.1% formic acid in CAN. The CFR was adjusted to 200 nL/min and the CT to 40° C. The electrospray voltage of 2 kV versus the MS inlet was employed.

MS was carried out in data dependent acquisition mode, which automatically changed between MS and MS/MS modes. The adjustment criteria were as follows: (1) MS: scan range (m/z) =350–1200; resolution=120,000; AGC target=400000; maximum injection time=50 ms; Filter Dynamic Exclusion: exclusion duration=30s; (2) HCD-MS/MS: resolution=15,000; AGC target=50000; maximum injection time=35 ms; collision energy=32.

### Database search

Raw DDA data processing and analysis was done with Spectronaut X (Biognosys AG, Switzerland), using default settings, to develop the initial search list. The search criteria included homo sapiens and trypsin as the

digestion enzyme. Carbamidomethyl (C) was assigned as the fixed alteration. Oxidation (M) was assigned as the variable alteration. The Q value (FDR) threshold for precursor and protein levels was set to 1%.

### DIA: Nano-HPLC-MS/MS analysis

The peptides were re-suspended in 30 µL of 0.1% formic acid in water and assessed as described above. The parameter adjustments were similar to the ones described above, except for a few alterations as is listed below: (1) MS: AGC target=1e6; (2) HCD-MS/MS: resolution=30,000; AGC target=1e6; collision energy=32; stepped CE=5%. (3) DIA was conducted with variable Isolation window, and each window overlapped 1 m/z, and the window quantity was 60.

### Data analysis

Data preparation and analysis were done as described above. We chose dynamic iRT as the retention time estimation type. Data retrieval via Spectronaut Pulsar [28] employed a large-scale mass calibration that used iRT calibration and gradient stability to generate an ideal dynamic extraction window. Precursor and protein q value (FDR) threshold was set to 1%. We also selected “mutated” decoy generation, which applied an arbitrary quantity of random numbers of AA position swamps (min=2, max=length/2). Subsequently, we quantified all identified precursors that passed the adjusted filters. The mean top 3 filtered peptides which passed the 1% Q value threshold were entered into the calculation of the key group quantities. Missing values are not filtered or filled in our study. The specific results of quantitative peptides and expression differential analysis, please refer to Supplementary Figure 2.

### Relationship analysis of samples

#### *Correlation analysis (CA) of replicas*

CA was conducted via R. This analysis produces a correlation coefficient (CC), which enables users to evaluate the reliability and operational stability of two parallel experiments. Experiment repeatability enhances the closer CC is to 1.

### WGCNA generation and age-related modules identification

#### *Network construction*

Co-expression networks were generated with the WGCNA (v1.47) package in R [29]. Following the elimination of irrelevant genes, the DEG values were entered into WGCNA to generate co-expression modules, based on the blockwise automatic network

generation tool. Modules were thus generated with mostly default settings, except for a few adjustments as follows: power: 6; TOM Type: unsigned; merge Cut Height: 0.7; and min Module Size: 50. Subsequently, genes placed in clusters in 14 associated modules.

### **Module and gene selection**

To identify clinically relevant modules, we employed module eigengenes to compute the CC of samples or sample traits. Intramodular connectivity (K.in) and module correlation degree (MM) of each gene were computed with the R package of WGCNA and genes with relatively high connectivity were identified as potential hub genes carrying clinically relevant functions. PCC between each gene and corresponding trait information was computed for all modules and gene significance value (GS) was measured for all genes. The generated networks were visualized in Cytoscape\_3.3.0 [30].

### **Functional analysis of module genes**

We also performed GO and KEGG pathway enrichment analysis on genes from all modules to discern the biological activity of the relevant genes in each module.

### **Functional analysis of module genes**

Gene Ontology (GO) [31] is an internationally recognized gene function stratification system. It provides the most recent definitions and properties of any genes and their products in an organism. GO examines three major categories: molecular function (MF), cellular component (CeCom), and biological process (BP). Its smallest unit is GO-term, which refers to a specific type of ontology. GO enrichment analysis enables us to determine which GO terms are markedly enriched in a given module, relative to the genome background. Using this information, one can screen for module genes that represent certain BP. We first mapped all module genes to the GO terms in the Gene Ontology database (<http://www.geneontology.org/>). Next, we calculated gene numbers for every term, before screening for markedly enriched GO terms, relative to background genome, as evidenced by the hypergeometric test. P-value was determined as follows

$$P = 1 - \sum_{i=0}^{m-1} \frac{\binom{M}{i} \binom{N-M}{n-i}}{\binom{N}{n}}$$

Here, N represents GO annotation-associated gene quantity; n denotes gene quantity in the module N; M represents the total quantity of specific GO term-related genes; m denotes gene quantity in the module M. The computed p-value underwent FDR Correction,

considering  $FDR \leq 0.05$  as the cut-off point. GO terms meeting these criteria were assigned as markedly enriched GO terms in module genes.

### **Pathway enrichment analysis (PEA)**

Protein-protein interactions are crucial regulators of biological functions. PEA is an excellent tool for elucidating the biological roles of genes in cells. KEGG is a commonly used public pathway-associated database [32]. Using PEA, we recognized essential signaling pathways associated with the Genes in the ten examined modules, relative to a genome background. The formula used to perform PEA was the same as GO terms, only instead of entering genes associated with GO terms, we entered genes associated with the KEGG annotation.

### **Protein-protein interaction (PPI) network generation using select modules and identified hub genes**

PPI network was generated via STRING (version 10.0; available online: <http://string-db.org>) [33], which plotted genes as nodes and interaction as lines, and it was visualized via the Cytoscape software [30], which displayed a core and hub gene biological interaction. The generated PPI network represented a database of known and predicted protein interactions, and only interactions with a combined score  $>0.9$  were marked as statistically significant.

### **Protein advanced functional annotation**

#### **The protein domain analysis (Pfam annotation)**

Pfam (Protein families database of alignments and hidden Markov models) is a database that includes protein structural information, based on the widely used multiple sequence alignment and hidden markov model (HMM). Protein domain prediction employed the Pfam\_scan [34] program developed by sanger. The protein sequence was compared with the Pfam database to obtain relevant annotation information of protein structures.

#### **TF analysis**

TFs regulate gene expression and are critical for development, cellular function, and disease response. The predicted protein sequences were compared with the TF database (plantTFDB [35]/animalTFDB [36]) using hmmscan.

#### **Subcellular localization analysis**

Protein activities are highly reliant upon their subcellular localizations. Hence, predicting protein localization directly from protein sequences can be highly beneficial in inferring protein functions. The software WoLFPSort [37] was used to predict the subcellular location of proteins and study their functions.

## Availability of data and material

The datasets generated during and/or analyzed during the current study are available from the corresponding author on reasonable request.

## AUTHOR CONTRIBUTIONS

HY and ZY designed research; XN, JJ, WZ, DG, NZ, ZW and SZ recruited the participants and collected their information and blood samples; XN conducted research; XN analyzed data and wrote manuscript; HY, LS, XZ, JQ, QC and QZ guided to modify manuscript; HY and ZY had primary responsibility for final content.

## ACKNOWLEDGMENTS

We thank all participants involved in the study. We thank all subjects who offered their plasma and basic information for this study and appreciate the work of all clinicians who helped evaluate samples and data.

## CONFLICTS OF INTEREST

The authors declare no conflicts of interests relevant to this article. All financial and material support for this research has no potential conflicts. All authors read and approved the final manuscript.

## ETHICAL STATEMENT AND CONSENT

Our protocols followed the Declaration of Helsinki and received approval from the ethical board at Beijing Hospital, Ministry of Health (2019BJYYEC-118-02). We received informed consent from all subjects and their guardians, retrieved detailed information about this research and any risks associated with it before subject recruitment.

## FUNDING

This work is supported by grants from by the National Key Research and Development Program of China (2018YFC2000400); Natural Science Foundation of China (81870552, 81400790, 81600622, 71490732, 91849118, 81849132, 81460203, 31760299, 81571385, 91849132, 91849118, 81872096); Guangxi Natural Science Foundation (2014GXNSFDA118028, 2018GXNSFAA138156, guike0991198); Self-funded Scientific Research Project of the health and family planning commission of Guangxi Zhuang Autonomous Region (Z20170162); Beijing Hospital Doctoral Scientific Research Foundation (BJ-2018-024), Beijing Hospital Nova Project (BJ-2018-139); Non-profit Central Research Institute Fund of Chinese Academy of Medical Sciences (2018RC330003).

## Editorial note

\*This corresponding author has a verified history of publications using a personal email address for correspondence.

## REFERENCES

1. Beard JR, Officer A, de Carvalho IA, Sadana R, Pot AM, Michel JP, Lloyd-Sherlock P, Epping-Jordan JE, Peeters GMEEG, Mahanani WR, Thiyagarajan JA, Chatterji S. The World report on ageing and health: a policy framework for healthy ageing. *Lancet*. 2016; 387:2145–54.  
[https://doi.org/10.1016/S0140-6736\(15\)00516-4](https://doi.org/10.1016/S0140-6736(15)00516-4)  
PMID:[26520231](https://pubmed.ncbi.nlm.nih.gov/26520231/)
2. Han LKM, Verhoeven JE, Tyrka AR, Penninx BWJH, Wolkowitz OM, Månsson KNT, Lindqvist D, Boks MP, Révész D, Mellon SH, Picard M. Accelerating research on biological aging and mental health: Current challenges and future directions. *Psychoneuroendocrinology*. 2019; 106:293–311.  
<https://doi.org/10.1016/j.psyneuen.2019.04.004>  
PMID:[31154264](https://pubmed.ncbi.nlm.nih.gov/31154264/)
3. Lehallier B, Gate D, Schaum N, Nanasi T, Lee SE, Yousef H, Moran Losada P, Berdnik D, Keller A, Verghese J, Sathyan S, Franceschi C, Milman S, et al. Undulating changes in human plasma proteome profiles across the lifespan. *Nat Med*. 2019; 25:1843–50.  
<https://doi.org/10.1038/s41591-019-0673-2>  
PMID:[31806903](https://pubmed.ncbi.nlm.nih.gov/31806903/)
4. Valdes AM, Glass D, Spector TD. Omics technologies and the study of human ageing. *Nat Rev Genet*. 2013; 14:601–7.  
<https://doi.org/10.1038/nrg3553>  
PMID:[23938363](https://pubmed.ncbi.nlm.nih.gov/23938363/)
5. Basisty N, Meyer JG, Schilling B. Protein Turnover in Aging and Longevity. *Proteomics*. 2018; 18:e1700108.  
<https://doi.org/10.1002/pmic.201700108>  
PMID:[29453826](https://pubmed.ncbi.nlm.nih.gov/29453826/)
6. Huang Q, Ning Y, Liu D, Zhang Y, Li D, Zhang Y, Yin Z, Fu B, Cai G, Sun X, Chen X. A Young Blood Environment Decreases Aging of Senile Mice Kidneys. *J Gerontol A Biol Sci Med Sci*. 2018; 73:421–8.  
<https://doi.org/10.1093/gerona/glx183>  
PMID:[29040401](https://pubmed.ncbi.nlm.nih.gov/29040401/)
7. Wang T, Yang N, Liang C, Xu H, An Y, Xiao S, Zheng M, Liu L, Wang G, Nie L. Detecting Protein-Protein Interaction Based on Protein Fragment Complementation Assay. *Curr Protein Pept Sci*. 2020; 21:598–610.  
<https://doi.org/10.2174/1389203721666200213102829>  
PMID:[32053071](https://pubmed.ncbi.nlm.nih.gov/32053071/)

8. Li C, Mo D, Li M, Zheng Y, Li Q, Ou S, Zhang Z. Age-related but not longevity-related genes are found by weighted gene co-expression network analysis in the peripheral blood cells of humans. *Genes Genet Syst.* 2019; 93:221–8.  
<https://doi.org/10.1266/ggs.17-00052> PMID:30541985
9. Matthiesen R, Jensen ON. Analysis of mass spectrometry data in proteomics. *Methods Mol Biol.* 2008; 453:105–22.  
[https://doi.org/10.1007/978-1-60327-429-6\\_4](https://doi.org/10.1007/978-1-60327-429-6_4) PMID:18712299
10. Xu R, Gong CX, Duan CM, Huang JC, Yang GQ, Yuan JJ, Zhang Q, Xiong XY, Yang QW. Age-Dependent Changes in the Plasma Proteome of Healthy Adults. *J Nutr Health Aging.* 2020; 24:846–56.  
<https://doi.org/10.1007/s12603-020-1392-6> PMID:33009535
11. Dijkstra DJ, Joeloem Singh JV, Bajema IM, Trouw LA. Complement activation and regulation in rheumatic disease. *Semin Immunol.* 2019; 45:101339.  
<https://doi.org/10.1016/j.smim.2019.101339> PMID:31718864
12. Wood JB, Jones LS, Soper NR, Xu M, Torres VJ, Buddy Creech C, Thomsen IP. Serologic Detection of Antibodies Targeting the Leukocidin LukAB Strongly Predicts Staphylococcus aureus in Children With Invasive Infection. *J Pediatric Infect Dis Soc.* 2019; 8:128–35.  
<https://doi.org/10.1093/jpids/piy017> PMID:29538707
13. Wen RT, Liang JH, Zhang HT. Targeting Phosphodiesterases in Pharmacotherapy for Substance Dependence. *Adv Neurobiol.* 2017; 17:413–44.  
[https://doi.org/10.1007/978-3-319-58811-7\\_15](https://doi.org/10.1007/978-3-319-58811-7_15) PMID:28956341
14. Sussman S, Skara S, Ames SL. Substance abuse among adolescents. *Subst Use Misuse.* 2008; 43:1802–28.  
<https://doi.org/10.1080/10826080802297302> PMID:19016166
15. Miller KD, Fidler-Benaoudia M, Keegan TH, Hipp HS, Jemal A, Siegel RL. Cancer statistics for adolescents and young adults, 2020. *CA Cancer J Clin.* 2020; 70:443–59.  
<https://doi.org/10.3322/caac.21637> PMID:32940362
16. Bonté F, Girard D, Archambault JC, Desmoulière A. Skin Changes During Ageing. *Subcell Biochem.* 2019; 91:249–80.  
[https://doi.org/10.1007/978-981-13-3681-2\\_10](https://doi.org/10.1007/978-981-13-3681-2_10) PMID:30888656
17. Kitada M, Ogura Y, Monno I, Koya D. The impact of dietary protein intake on longevity and metabolic health. *EBioMedicine.* 2019; 43:632–40.  
<https://doi.org/10.1016/j.ebiom.2019.04.005> PMID:30975545
18. Le Couteur DG, Solon-Biet S, Cogger VC, Mitchell SJ, Senior A, de Cabo R, Raubenheimer D, Simpson SJ. The impact of low-protein high-carbohydrate diets on aging and lifespan. *Cell Mol Life Sci.* 2016; 73:1237–52.  
<https://doi.org/10.1007/s00018-015-2120-y> PMID:26718486
19. Zahid KR, Yao S, Khan ARR, Raza U, Gou D. mTOR/HDAC1 Crosstalk Mediated Suppression of ADH1A and ALDH2 Links Alcohol Metabolism to Hepatocellular Carcinoma Onset and Progression *in silico.* *Front Oncol.* 2019; 9:1000.  
<https://doi.org/10.3389/fonc.2019.01000> PMID:31637215
20. Li H, Ericsson M, Rabasha B, Budnik B, Chan SH, Freinkman E, Lewis CA, Doench JG, Wagner BK, Garraway LA, Schreiber SL. 6-Phosphogluconate Dehydrogenase Links Cytosolic Carbohydrate Metabolism to Protein Secretion via Modulation of Glutathione Levels. *Cell Chem Biol.* 2019; 26:1306–14.e5.  
<https://doi.org/10.1016/j.chembiol.2019.05.006> PMID:31204288
21. Lin R, Elf S, Shan C, Kang HB, Ji Q, Zhou L, Hitosugi T, Zhang L, Zhang S, Seo JH, Xie J, Tucker M, Gu TL, et al. 6-Phosphogluconate dehydrogenase links oxidative PPP, lipogenesis and tumour growth by inhibiting LKB1-AMPK signalling. *Nat Cell Biol.* 2015; 17:1484–96.  
<https://doi.org/10.1038/ncb3255> PMID:26479318
22. Al-Shamsi AM, Ben-Salem S, Hertecant J, Al-Jasmi F. Transaldolase deficiency caused by the homozygous p.R192C mutation of the TALDO1 gene in four Emirati patients with considerable phenotypic variability. *Eur J Pediatr.* 2015; 174:661–8.  
<https://doi.org/10.1007/s00431-014-2449-5> PMID:25388407
23. Ilatovskaya DV, Halade GV, DeLeon-Pennell KY. Adaptive immunity-driven inflammation and cardiovascular disease. *Am J Physiol Heart Circ Physiol.* 2019; 317:H1254–7.  
<https://doi.org/10.1152/ajpheart.00642.2019> PMID:31702971
24. Sadighi Akha AA. Aging and the immune system: An overview. *J Immunol Methods.* 2018; 463:21–6.  
<https://doi.org/10.1016/j.jim.2018.08.005> PMID:30114401
25. Wang W, Xing H, Huang C, Pan H, Li D. Identification of pancreatic cancer type related factors by Weighted Gene Co-Expression Network Analysis. *Med Oncol.* 2020; 37:33.  
<https://doi.org/10.1007/s12032-020-1339-0> PMID:32200436

26. Zhang Z, Mao W, Wang L, Liu M, Zhang W, Wu Y, Zhang J, Mao S, Geng J, Yao X. Depletion of CDC5L inhibits bladder cancer tumorigenesis. *J Cancer*. 2020; 11:353–63.  
<https://doi.org/10.7150/jca.32850>  
PMID:[31897231](https://pubmed.ncbi.nlm.nih.gov/31897231/)
27. Kučírek M, Bagherpoor AJ, Jaroš J, Hampl A, Štros M. HMGB2 is a negative regulator of telomerase activity in human embryonic stem and progenitor cells. *FASEB J*. 2019; 33:14307–24.  
<https://doi.org/10.1096/fj.201901465RRR>  
PMID:[31661640](https://pubmed.ncbi.nlm.nih.gov/31661640/)
28. Kim YJ, Chambers AG, Cecchi F, Hembrough T. Targeted data-independent acquisition for mass spectrometric detection of RAS mutations in formalin-fixed, paraffin-embedded tumor biopsies. *J Proteomics*. 2018; 189:91–6.  
<https://doi.org/10.1016/j.jprot.2018.04.022>  
PMID:[29684684](https://pubmed.ncbi.nlm.nih.gov/29684684/)
29. Langfelder P, Horvath S. WGCNA: an R package for weighted correlation network analysis. *BMC Bioinformatics*. 2008; 9:559.  
<https://doi.org/10.1186/1471-2105-9-559>  
PMID:[19114008](https://pubmed.ncbi.nlm.nih.gov/19114008/)
30. Shannon P, Markiel A, Ozier O, Baliga NS, Wang JT, Ramage D, Amin N, Schwikowski B, Ideker T. Cytoscape: a software environment for integrated models of biomolecular interaction networks. *Genome Res*. 2003; 13:2498–504.  
<https://doi.org/10.1101/gr.1239303>  
PMID:[14597658](https://pubmed.ncbi.nlm.nih.gov/14597658/)
31. Ashburner M, Ball CA, Blake JA, Botstein D, Butler H, Cherry JM, Davis AP, Dolinski K, Dwight SS, Eppig JT, Harris MA, Hill DP, Issel-Tarver L, et al. Gene ontology: tool for the unification of biology. The Gene Ontology Consortium. *Nat Genet*. 2000; 25:25–9.  
<https://doi.org/10.1038/75556>  
PMID:[10802651](https://pubmed.ncbi.nlm.nih.gov/10802651/)
32. Kanehisa M, Goto S. KEGG: kyoto encyclopedia of genes and genomes. *Nucleic Acids Res*. 2000; 28:27–30.  
<https://doi.org/10.1093/nar/28.1.27>  
PMID:[10592173](https://pubmed.ncbi.nlm.nih.gov/10592173/)
33. Szklarczyk D, Franceschini A, Wyder S, Forslund K, Heller D, Huerta-Cepas J, Simonovic M, Roth A, Santos A, Tsafou KP, Kuhn M, Bork P, Jensen LJ, von Mering C. STRING v10: protein-protein interaction networks, integrated over the tree of life. *Nucleic Acids Res*. 2015; 43:D447–52.  
<https://doi.org/10.1093/nar/gku1003> PMID:[25352553](https://pubmed.ncbi.nlm.nih.gov/25352553/)
34. Finn RD, Coghill P, Eberhardt RY, Eddy SR, Mistry J, Mitchell AL, Potter SC, Punta M, Qureshi M, Sangrador-Vegas A, Salazar GA, Tate J, Bateman A. The Pfam protein families database: towards a more sustainable future. *Nucleic Acids Res*. 2016; 44:D279–85.  
<https://doi.org/10.1093/nar/gkv1344>  
PMID:[26673716](https://pubmed.ncbi.nlm.nih.gov/26673716/)
35. Jin J, Zhang H, Kong L, Gao G, Luo J. PlantTFDB 3.0: a portal for the functional and evolutionary study of plant transcription factors. *Nucleic Acids Res*. 2014; 42:D1182–7.  
<https://doi.org/10.1093/nar/gkt1016> PMID:[24174544](https://pubmed.ncbi.nlm.nih.gov/24174544/)
36. Zhang HM, Chen H, Liu W, Liu H, Gong J, Wang H, Guo AY. AnimalTFDB: a comprehensive animal transcription factor database. *Nucleic Acids Res*. 2012; 40:D144–9.  
<https://doi.org/10.1093/nar/gkr965>  
PMID:[22080564](https://pubmed.ncbi.nlm.nih.gov/22080564/)
37. Horton P, Park KJ, Obayashi T, Fujita N, Harada H, Adams-Collier CJ, Nakai K. WoLF PSORT: protein localization predictor. *Nucleic Acids Res*. 2007; 35:W585–7.  
<https://doi.org/10.1093/nar/gkm259>  
PMID:[17517783](https://pubmed.ncbi.nlm.nih.gov/17517783/)



# SUPPLEMENTARY MATERIALS

## Supplementary Figures

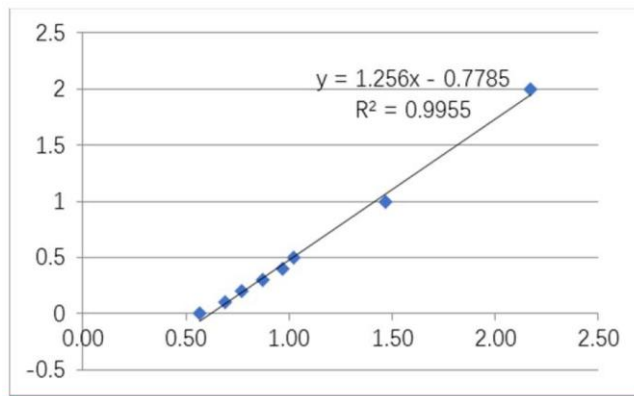

Supplementary Figure 1. The quantitative standard curve of BCA.

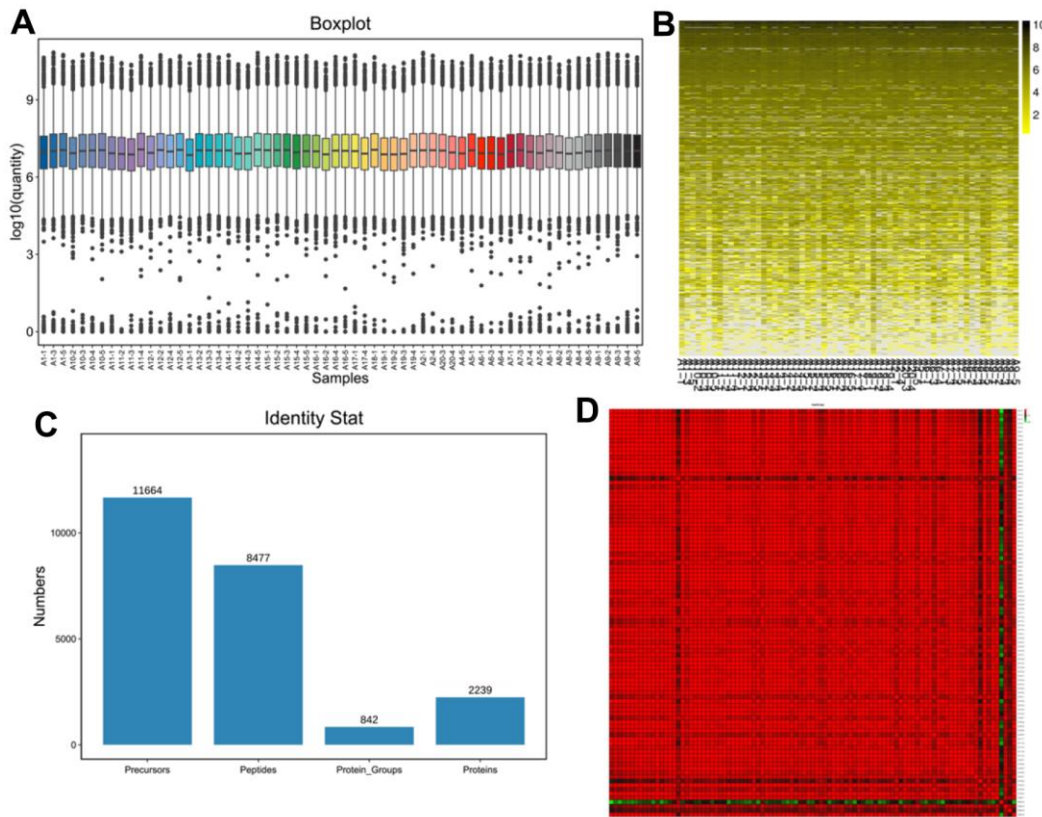

Supplementary Figure 2. The analysis of sample quality and sample relationship. (A) The violin plots. The data density of all proteins anywhere in each age group and protein abundance expression in samples or inter groups are shown for visualization. (B) The heatmap of quantitative protein in samples. (C) Statistical results of protein and peptide segment identification. (D) The correlation heatmap of samples. The Pearson correlation between two samples computed to analyze the difference between repeating samples and samples between groups.

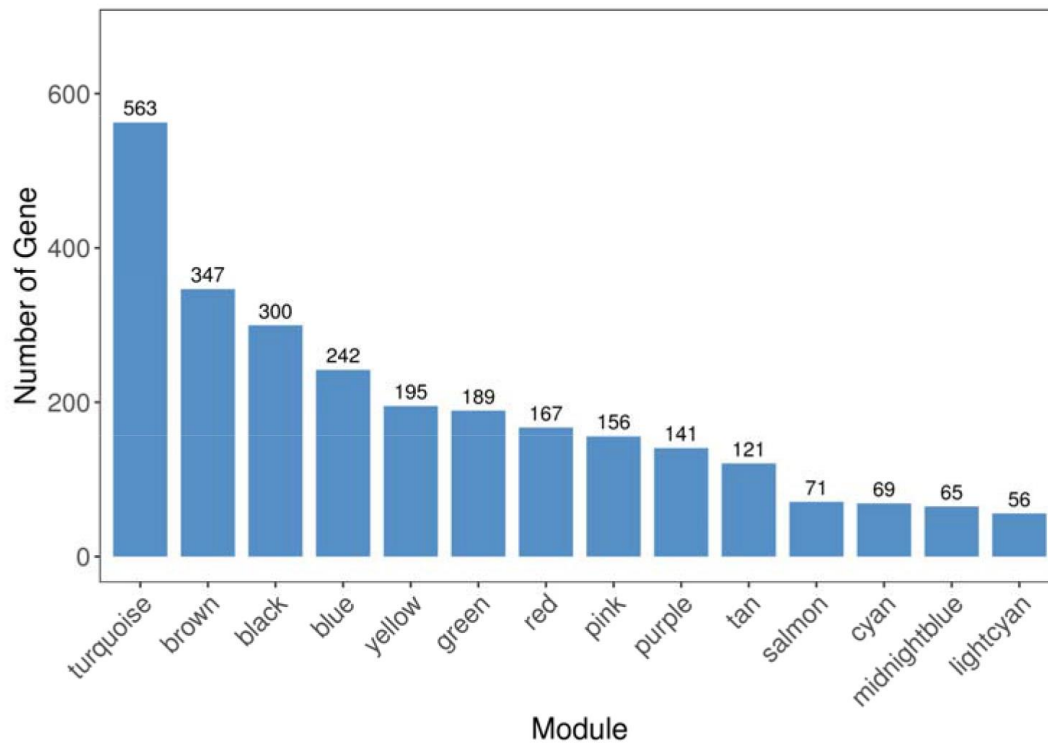

Supplementary Figure 3. The number of genes in each module.

### Clustering of module eigengenes

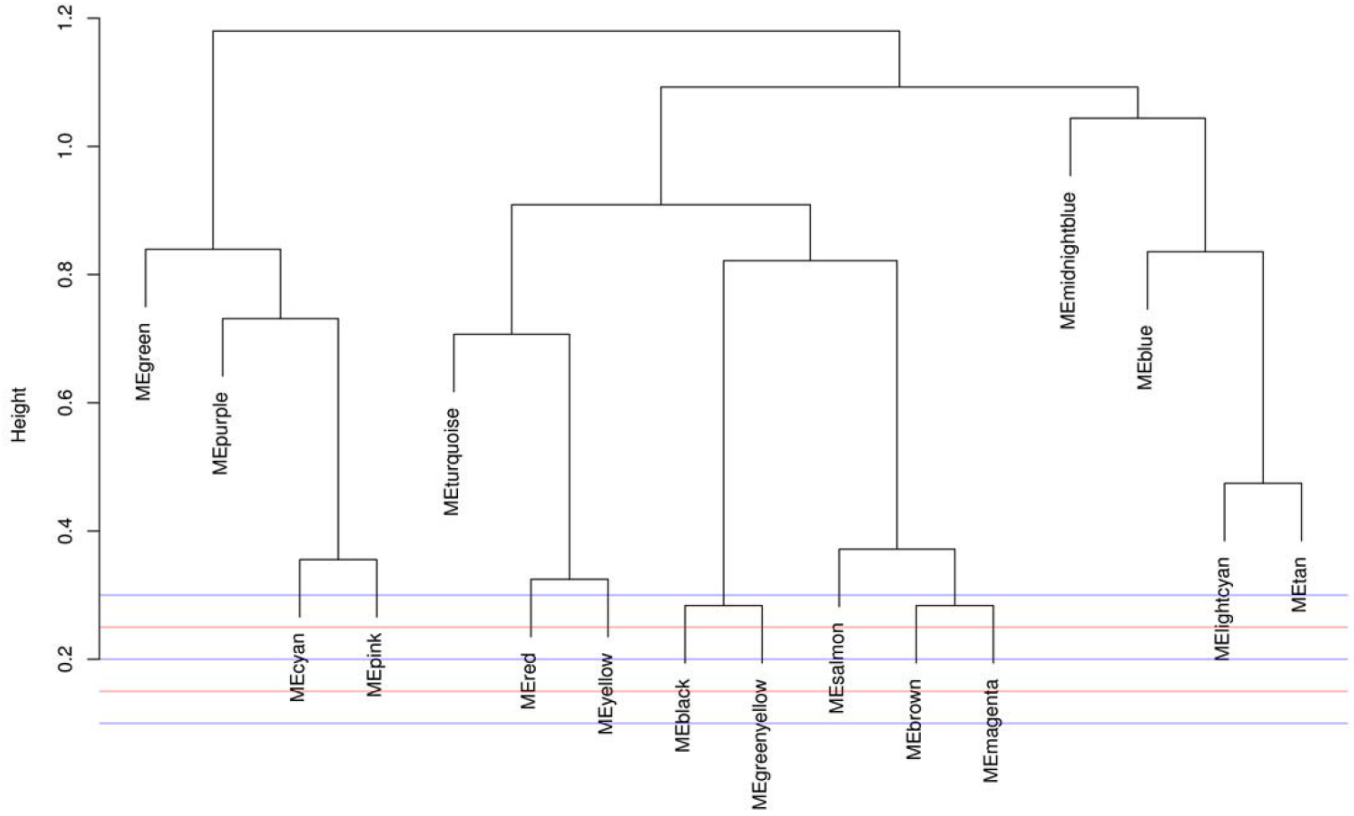

Supplementary Figure 4. The clustering of module eigengene.

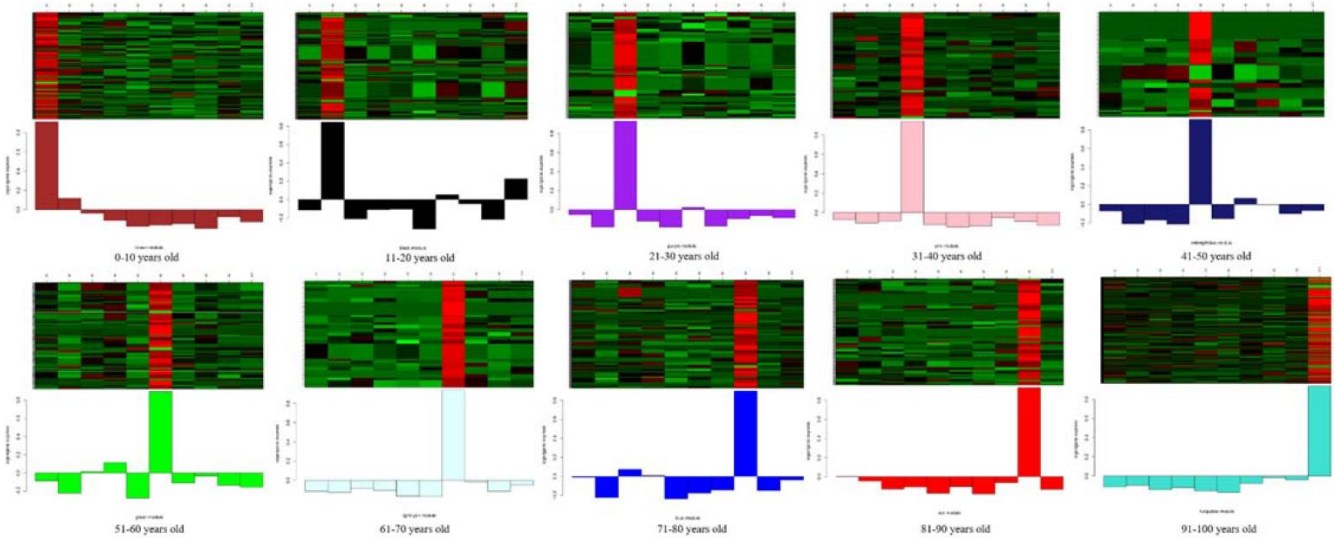

Supplementary Figure 5. The proteins in each module associated with age.

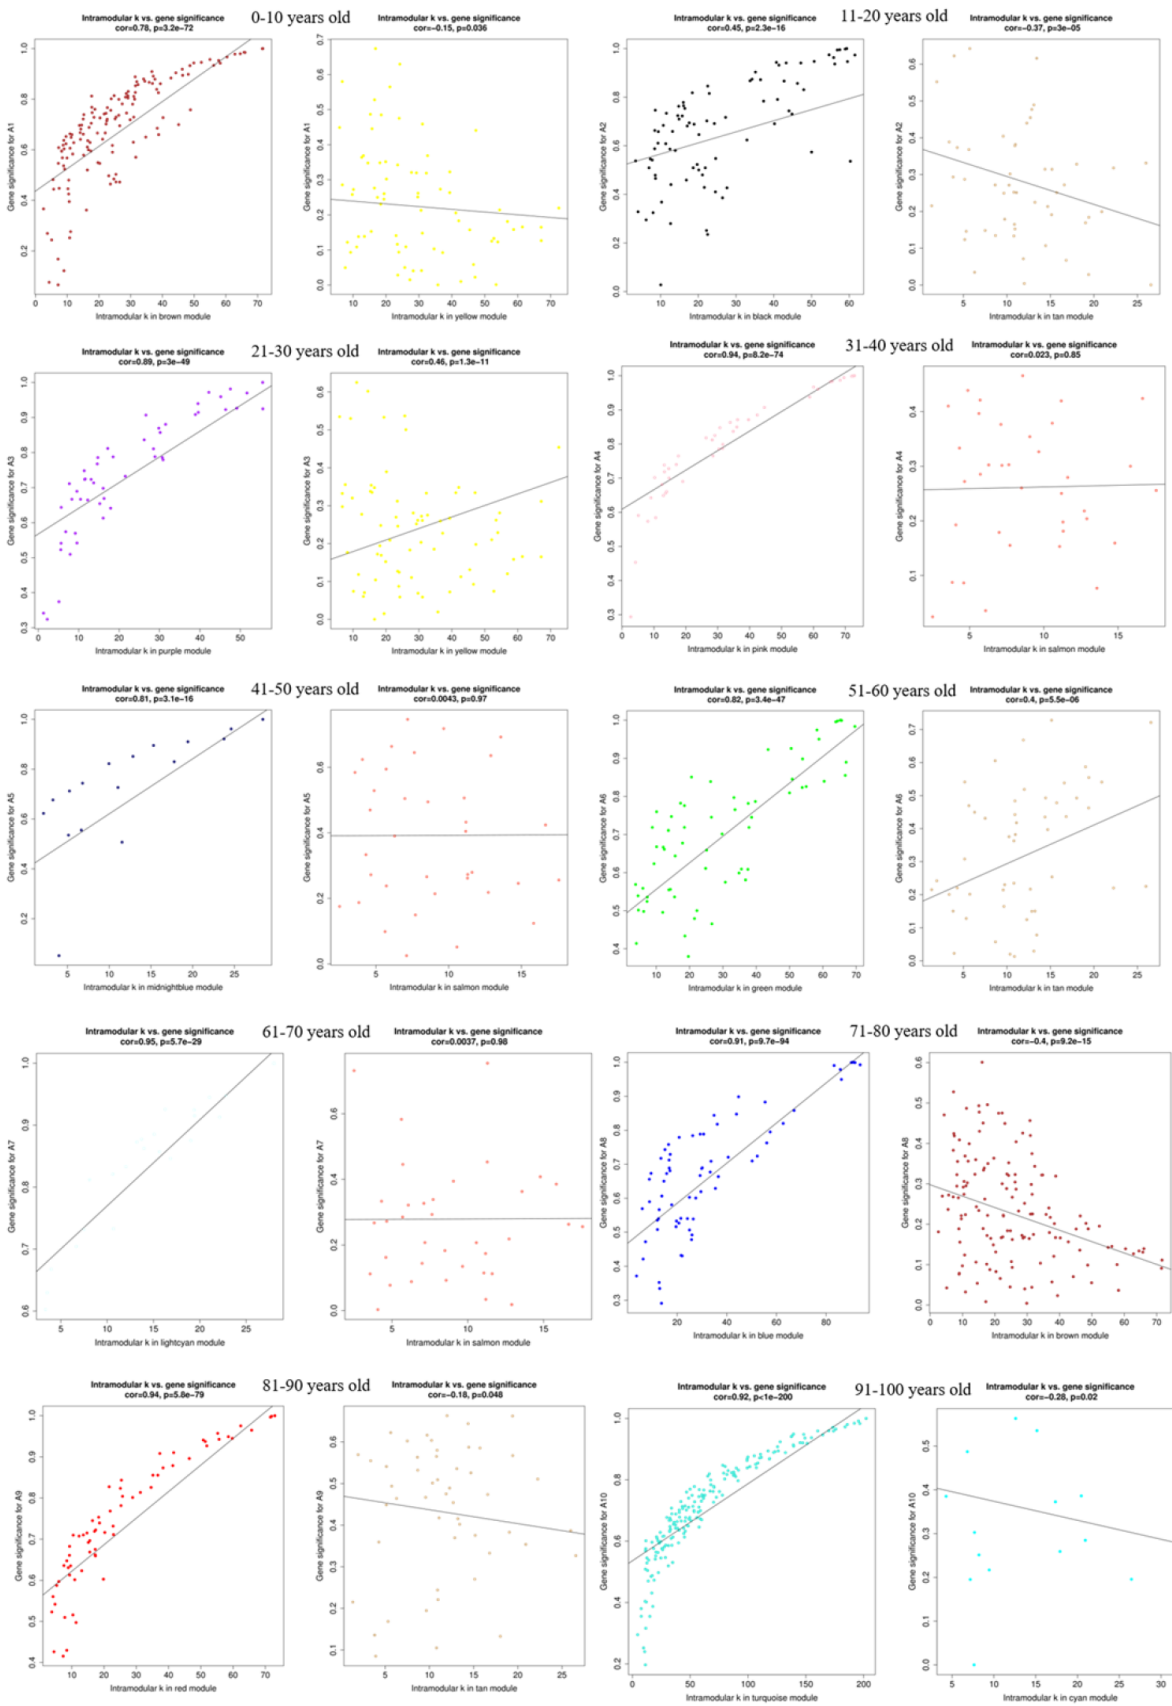

Supplementary Figure 6. Intramodular connectivity (K.in) scatter plot analysis.

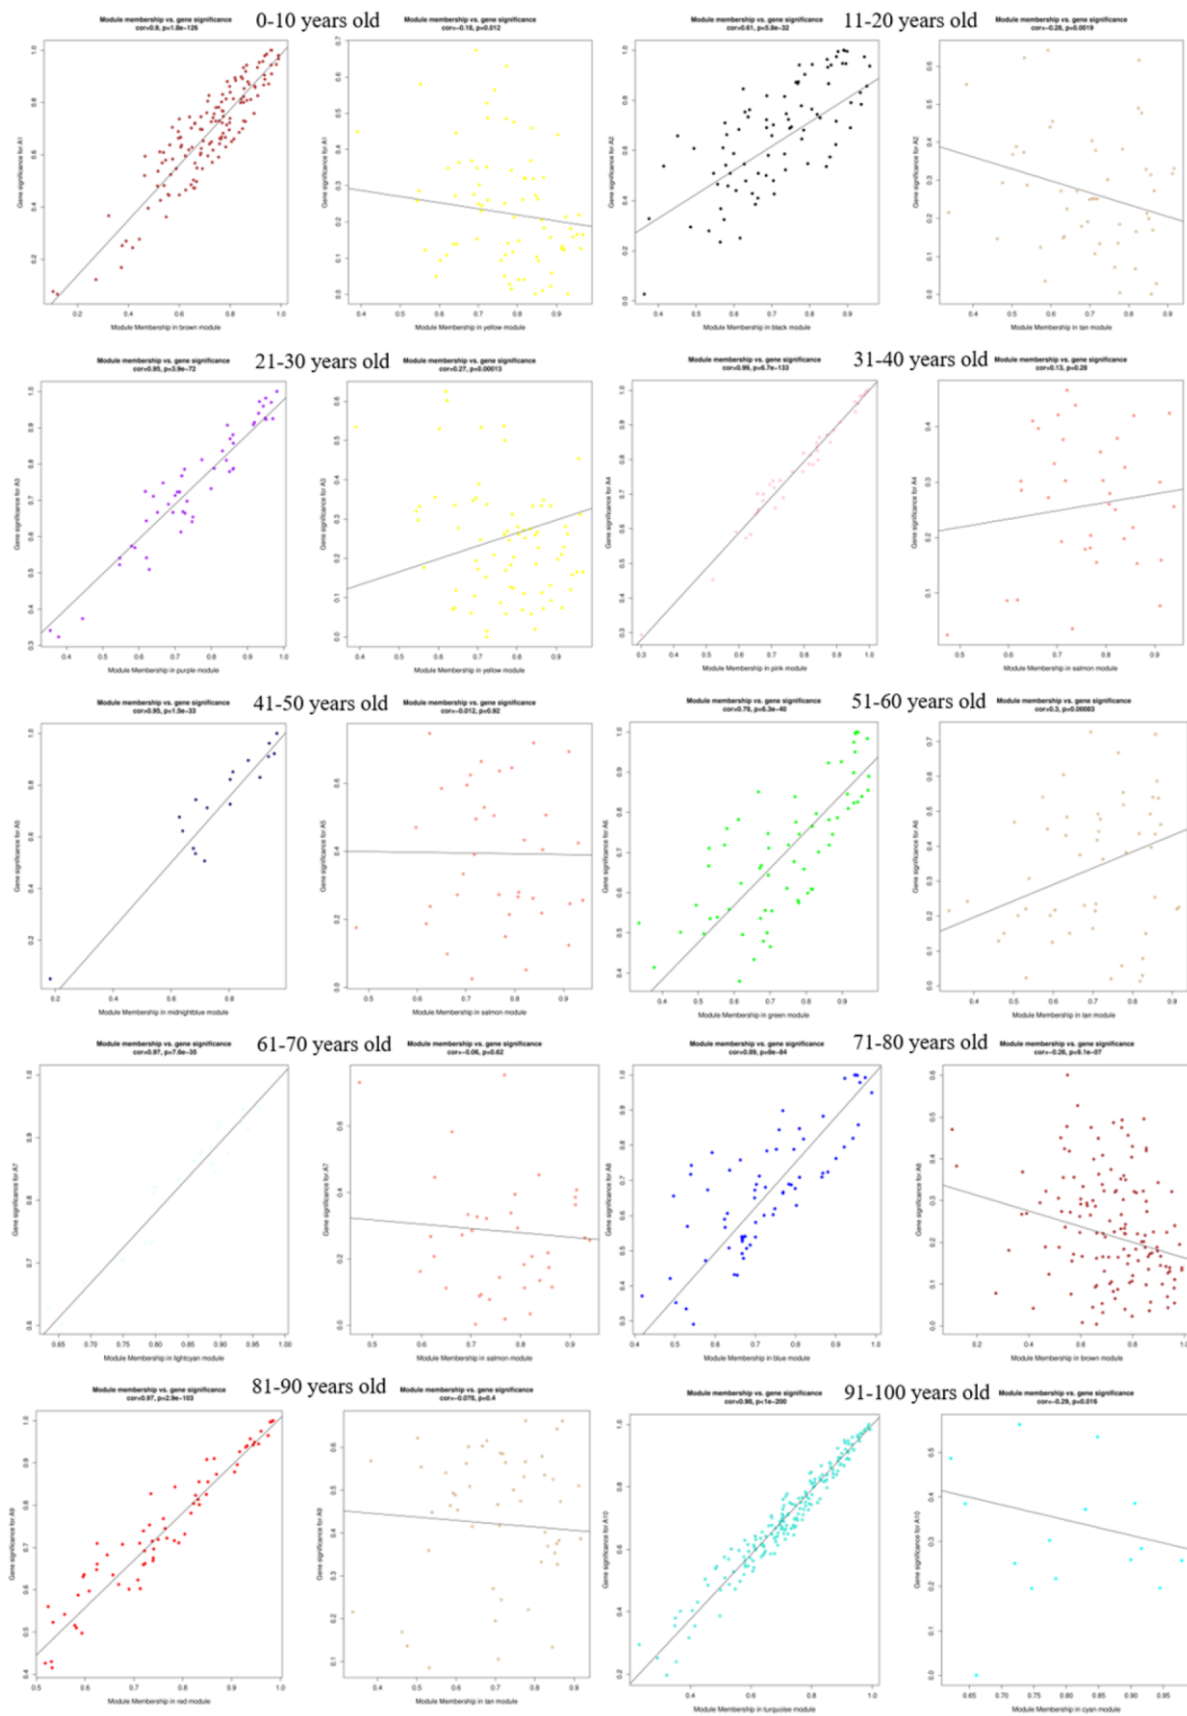

Supplementary Figure 7. Module correlation degree (MM) scatter plot analysis.

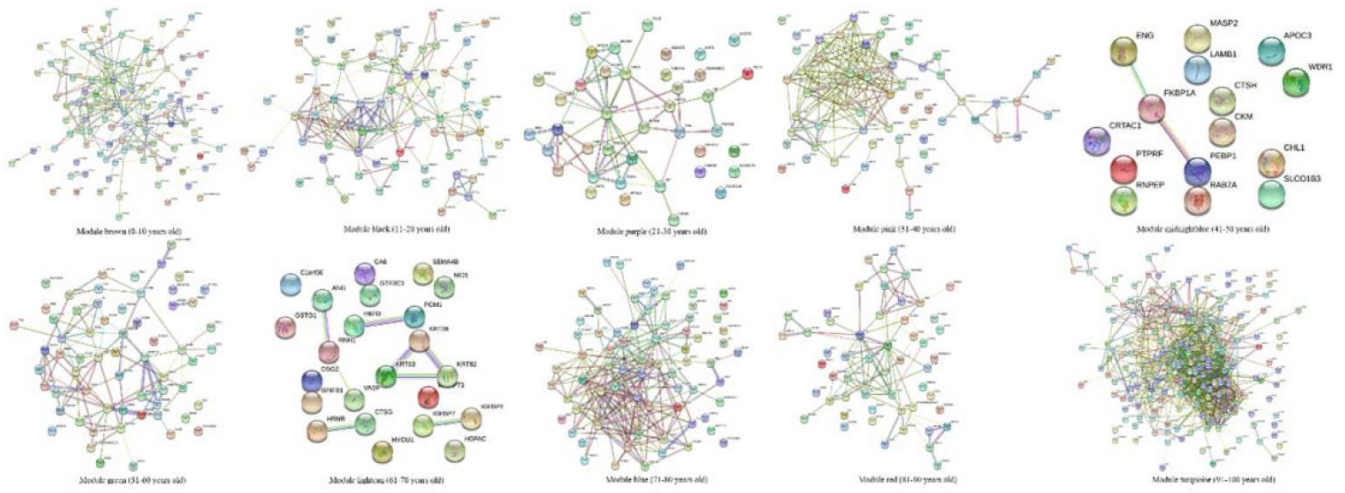

Supplementary Figure 8. Interaction network of proteins in each module associated with age.

## Supplementary Tables

Please browse the Full text version of this manuscript to see the data of Supplementary Tables 4 and 5.

**Supplementary Table 1. Comparisons of gender and ethnicity among the ten groups.**

| <b>Age</b> | <b>N(Male)</b> | <b>N(Female)</b> | <b>p-value</b> | <b>N(Han)</b> | <b>N(other ethnic)</b> | <b>p-value</b> |
|------------|----------------|------------------|----------------|---------------|------------------------|----------------|
| 0-10       | 3              | 6                | ref            | 6             | 3                      | ref            |
| 11-20      | 4              | 6                | 0.764          | 9             | 1                      | 0.213          |
| 21-30      | 1              | 7                | 0.312          | 7             | 1                      | 0.312          |
| 31-40      | 3              | 7                | 0.876          | 10            | 0                      | 0.050          |
| 41-50      | 5              | 5                | 0.463          | 9             | 1                      | 0.213          |
| 51-60      | 4              | 6                | 0.764          | 9             | 1                      | 0.213          |
| 61-70      | 6              | 4                | 0.245          | 10            | 0                      | 0.050          |
| 71-80      | 3              | 7                | 0.876          | 10            | 0                      | 0.050          |
| 81-90      | 4              | 6                | 0.764          | 10            | 0                      | 0.050          |
| 91-100     | 4              | 6                | 0.764          | 7             | 3                      | 0.876          |

N, number.

**Supplementary Table 2. The results of protein quantification.**

| <b>Sample ID</b> | <b>Protein concentration (<math>\mu\text{g}/\mu\text{l}</math>)</b> | <b>Total protein (mg)</b> |
|------------------|---------------------------------------------------------------------|---------------------------|
| 1                | 62.623                                                              | 3.131                     |
| 2                | 111.776                                                             | 5.589                     |
| 3                | 105.119                                                             | 5.256                     |
| 4                | 67.816                                                              | 3.391                     |
| 5                | 111.663                                                             | 5.583                     |
| 6                | 83.133                                                              | 4.157                     |
| 7                | 91.109                                                              | 4.555                     |
| 8                | 105.540                                                             | 5.277                     |
| 9                | 98.105                                                              | 4.905                     |
| 10               | 134.748                                                             | 6.737                     |
| 11               | 110.275                                                             | 5.514                     |
| 12               | 99.361                                                              | 4.968                     |
| 13               | 143.660                                                             | 7.183                     |
| 14               | 89.162                                                              | 4.458                     |
| 15               | 104.221                                                             | 5.211                     |
| 16               | 119.205                                                             | 5.960                     |
| 17               | 159.810                                                             | 7.991                     |
| 18               | 99.511                                                              | 4.976                     |
| 19               | 173.747                                                             | 8.687                     |
| 20               | 148.049                                                             | 7.402                     |
| 21               | 128.456                                                             | 6.423                     |
| 22               | 108.749                                                             | 5.437                     |
| 23               | 171.154                                                             | 8.558                     |
| 24               | 108.014                                                             | 5.401                     |
| 25               | 97.740                                                              | 4.887                     |
| 26               | 85.325                                                              | 4.266                     |
| 27               | 112.743                                                             | 5.637                     |
| 28               | 116.442                                                             | 5.822                     |
| 29               | 106.432                                                             | 5.322                     |
| 30               | 119.538                                                             | 5.977                     |
| 31               | 109.427                                                             | 5.471                     |
| 32               | 141.895                                                             | 7.095                     |
| 33               | 113.742                                                             | 5.687                     |
| 34               | 109.340                                                             | 5.467                     |
| 35               | 97.615                                                              | 4.881                     |
| 36               | 74.705                                                              | 3.735                     |
| 37               | 88.691                                                              | 4.435                     |
| 38               | 100.196                                                             | 5.010                     |
| 39               | 136.595                                                             | 6.830                     |
| 40               | 102.940                                                             | 5.147                     |
| 41               | 101.672                                                             | 5.084                     |
| 42               | 73.901                                                              | 3.695                     |
| 43               | 114.163                                                             | 5.708                     |
| 44               | 134.968                                                             | 6.748                     |
| 45               | 122.829                                                             | 6.141                     |
| 46               | 86.951                                                              | 4.348                     |
| 47               | 92.723                                                              | 4.636                     |
| 48               | 103.895                                                             | 5.195                     |



|    |         |       |
|----|---------|-------|
| 49 | 126.013 | 6.301 |
| 50 | 158.675 | 7.934 |
| 51 | 119.344 | 5.967 |
| 52 | 146.266 | 7.313 |
| 53 | 116.405 | 5.820 |
| 54 | 139.000 | 6.950 |
| 55 | 74.762  | 3.738 |
| 56 | 112.655 | 5.633 |
| 57 | 109.314 | 5.466 |
| 58 | 80.715  | 4.036 |
| 59 | 99.329  | 4.966 |
| 60 | 83.026  | 4.151 |
| 61 | 105.816 | 5.291 |
| 62 | 111.406 | 5.570 |
| 63 | 96.352  | 4.818 |
| 64 | 101.527 | 5.076 |
| 65 | 90.682  | 4.534 |
| 66 | 76.018  | 3.801 |
| 67 | 104.730 | 5.237 |
| 68 | 102.639 | 5.132 |
| 69 | 113.491 | 5.675 |
| 70 | 116.668 | 5.833 |
| 71 | 110.997 | 5.550 |
| 72 | 87.077  | 4.354 |
| 73 | 81.048  | 4.052 |
| 74 | 75.559  | 3.778 |
| 75 | 79.635  | 3.982 |
| 76 | 61.982  | 3.099 |
| 77 | 74.655  | 3.733 |
| 78 | 104.843 | 5.242 |
| 79 | 114.841 | 5.742 |
| 80 | 85.155  | 4.258 |
| 81 | 74.454  | 3.723 |
| 82 | 121.014 | 6.051 |
| 83 | 134.215 | 6.711 |
| 84 | 83.836  | 4.192 |
| 85 | 81.682  | 4.084 |
| 86 | 106.815 | 5.341 |
| 87 | 121.322 | 6.066 |
| 88 | 112.856 | 5.643 |
| 89 | 90.845  | 4.542 |
| 90 | 85.846  | 4.292 |
| 91 | 67.194  | 3.360 |
| 92 | 96.962  | 4.848 |
| 93 | 76.357  | 3.818 |
| 94 | 100.792 | 5.040 |
| 95 | 96.698  | 4.835 |
| 96 | 88.389  | 4.419 |
| 97 | 74.517  | 3.726 |

---

**Supplementary Table 3. The top 5 of Gene Ontology (GO)-biological process (BP) in each age group.**

| Age groups (modules)           | GO ID      | Description                                                        | p-value   |
|--------------------------------|------------|--------------------------------------------------------------------|-----------|
| 0-10 years old (brown)         | GO:0006956 | complement activation                                              | 2.245E-57 |
|                                | GO:0072376 | protein activation cascade                                         | 2.754E-56 |
|                                | GO:0002455 | humoral immune response mediated by circulating immunoglobulin     | 2.522E-53 |
|                                | GO:0006958 | complement activation, classical pathway                           | 2.556E-53 |
|                                | GO:0006959 | humoral immune response                                            | 1.125E-49 |
| 11-20 years old (black)        | GO:0002443 | leukocyte mediated immunity                                        | 2.597E-14 |
|                                | GO:0006955 | immune response                                                    | 3.232E-14 |
|                                | GO:0001775 | cell activation                                                    | 1.282E-13 |
|                                | GO:0045055 | regulated exocytosis                                               | 1.478E-13 |
|                                | GO:0002252 | immune effector process                                            | 1.539E-13 |
| 21-30 years old (purple)       | GO:0006334 | nucleosome assembly                                                | 4.122E-23 |
|                                | GO:0031497 | chromatin assembly                                                 | 6.807E-22 |
|                                | GO:0034728 | nucleosome organization                                            | 4.172E-21 |
|                                | GO:0006333 | chromatin assembly or disassembly                                  | 9.201E-21 |
|                                | GO:0006323 | DNA packaging                                                      | 6.817E-20 |
| 31-40 years old (pink)         | GO:0031424 | keratinization                                                     | 4.207E-28 |
|                                | GO:0030216 | keratinocyte differentiation                                       | 5.435E-25 |
|                                | GO:0008544 | epidermis development                                              | 3.925E-23 |
|                                | GO:0009913 | epidermal cell differentiation                                     | 3.926E-23 |
|                                | GO:0043588 | skin development                                                   | 5.422E-23 |
| 41-50 years old (midnightblue) | GO:1900121 | negative regulation of receptor binding                            | 1.135E-04 |
|                                | GO:1900120 | regulation of receptor binding                                     | 3.487E-04 |
|                                | GO:0061384 | heart trabecula morphogenesis                                      | 5.989E-04 |
|                                | GO:0044092 | negative regulation of molecular function                          | 1.029E-03 |
|                                | GO:0010987 | negative regulation of high-density lipoprotein particle clearance | 1.072E-03 |
| 51-60 years old (green)        | GO:0045055 | regulated exocytosis                                               | 9.516E-15 |
|                                | GO:0006887 | exocytosis                                                         | 1.909E-14 |
|                                | GO:0016192 | vesicle-mediated transport                                         | 2.294E-13 |
|                                | GO:0043312 | neutrophil degranulation                                           | 2.993E-11 |
|                                | GO:0002283 | neutrophil activation involved in immune response                  | 3.281E-11 |
| 61-70 years old (lightcyan)    | GO:0031424 | keratinization                                                     | 1.636E-05 |
|                                | GO:0070268 | cornification                                                      | 2.032E-05 |
|                                | GO:0030216 | keratinocyte differentiation                                       | 7.042E-05 |
|                                | GO:0009913 | epidermal cell differentiation                                     | 1.684E-04 |
|                                | GO:0006959 | humoral immune response                                            | 2.080E-04 |
| 71-80 years old (blue)         | GO:0002576 | platelet degranulation                                             | 7.913E-16 |
|                                | GO:0030168 | platelet activation                                                | 4.977E-13 |
|                                | GO:0045055 | regulated exocytosis                                               | 1.144E-12 |
|                                | GO:0016192 | vesicle-mediated transport                                         | 1.335E-12 |
|                                | GO:0001775 | cell activation                                                    | 1.828E-12 |
| 81-90 years old (red)          | GO:0072376 | protein activation cascade                                         | 3.909E-21 |
|                                | GO:0006956 | complement activation                                              | 4.606E-19 |
|                                | GO:0002455 | humoral immune response mediated by circulating immunoglobulin     | 1.445E-18 |
|                                | GO:0002250 | adaptive immune response                                           | 4.720E-18 |
|                                | GO:0006958 | complement activation, classical pathway                           | 1.330E-17 |
| 91-100 years old (turquoise)   | GO:0006342 | chromatin silencing                                                | 9.295E-51 |
|                                | GO:0045814 | negative regulation of gene expression, epigenetic                 | 1.863E-48 |
|                                | GO:0000183 | chromatin silencing at rDNA                                        | 6.490E-46 |
|                                | GO:0002376 | immune system process                                              | 1.392E-43 |
|                                | GO:0006335 | DNA replication-dependent nucleosome assembly                      | 9.825E-39 |

**Supplementary Table 4. The top 10 of Kyoto Encyclopedia of Genes and Genomes (KEGG) in each age group.**

**Supplementary Table 5. The protein–protein interaction (PPI) analysis with high combined scores (value > 0.9) and low co-expression coefficients (value = 0) in different modules.**

**Supplementary Table 6. The molecular functions of hub genes.**

| Age groups       | Module    | Hub genes | Connectivity | Description                                               | KEGG class                                                                                         |
|------------------|-----------|-----------|--------------|-----------------------------------------------------------|----------------------------------------------------------------------------------------------------|
| 0-10 years old   | brown     | ARPC2     | 16.766       | actin related protein 2/3 complex subunit 2               | Human Diseases;Cellular Processes; Organismal Systems                                              |
|                  |           | ARPC5     | 18.201       | actin related protein 2/3 complex subunit 5               | Human Diseases;Cellular Processes; Organismal Systems                                              |
|                  |           | DDX39B    | 49.029       | DExD-box helicase 39B                                     | Genetic Information Processing                                                                     |
|                  |           | HNRNPK    | 64.876       | heterogeneous nuclear ribonucleoprotein K                 | Human Diseases; Genetic Information Processing                                                     |
|                  |           | HNRNPA2B1 | 66.056       | heterogeneous nuclear ribonucleoprotein A2/B1             | -                                                                                                  |
| 11-20 years old  | black     | EEF2      | 69.684       | eukaryotic translation elongation factor 2                | Organismal Systems;Environmental Information Processing                                            |
|                  |           | UBA52     | 54.320       | ubiquitin A-52 residue ribosomal protein fusion product 1 | Genetic Information Processing                                                                     |
|                  |           | RPS27A    | 54.320       | ribosomal protein S27a                                    | Genetic Information Processing                                                                     |
|                  |           | UBB       | 54.320       | ubiquitin B                                               | Human Diseases;Cellular Processes                                                                  |
|                  |           | UBC       | 54.320       | ubiquitin C                                               | Organismal Systems                                                                                 |
|                  |           | ADH1A     | 65.236       | alcohol dehydrogenase 1A (class I), alpha polypeptide     | Metabolism;Human Diseases                                                                          |
|                  |           | ADH1B     | 65.236       | alcohol dehydrogenase 1B (class I), beta polypeptide      | Metabolism;Human Diseases                                                                          |
| 51-60 years old  | green     | ARPC3     | 22.205       | actin related protein 2/3 complex subunit 3               | Human Diseases;Cellular Processes;Organismal Systems                                               |
|                  |           | ARPC4     | 24.819       | actin related protein 2/3 complex subunit 4               | Human Diseases;Cellular Processes;Organismal Systems                                               |
|                  |           | PGD       | 8.834        | phosphogluconate dehydrogenase                            | Metabolism                                                                                         |
|                  |           | TALDO1    | 4.664        | transaldolase 1                                           | Metabolism                                                                                         |
|                  |           | ACTB      | 25.966       | actin beta                                                | Human Diseases;Organismal Systems;Cellular Processes;Environmental Information Processing          |
|                  |           | ACTC1     | 57.476       | actin alpha cardiac muscle 1                              | Organismal Systems;Human Diseases                                                                  |
|                  |           | ACTBL2    | 52.264       | actin beta like 2                                         | -                                                                                                  |
| 71-80 years old  | blue      | ACTC1     | 57.476       | actin alpha cardiac muscle 1                              | Organismal Systems;Human Diseases                                                                  |
|                  |           | COL1A1    | 16.750       | collagen type I alpha 1 chain                             | Human Diseases;Environmental Information Processing;Cellular Processes;Organismal Systems          |
|                  |           | COL1A2    | 90.917       | collagen type I alpha 2 chain                             | Human Diseases; Environmental Information Processing; Cellular Processes; Organismal Systems       |
|                  |           | CALR      | 14.716       | calreticulin                                              | Human Diseases; Genetic Information Processing; Cellular Processes; Organismal Systems             |
| 81-90 years old  | red       | HSPA5     | 13.575       | heat shock protein family A (Hsp70) member 5              | Genetic Information Processing; Organismal Systems; Human Diseases; Genetic Information Processing |
|                  |           | AHSG      | 72.648       | alpha 2-HS glycoprotein                                   | -                                                                                                  |
|                  |           | APOA1     | 48.668       | apolipoprotein A1                                         | Organismal Systems; Human Diseases                                                                 |
|                  |           | FGA       | 45.072       | fibrinogen alpha chain                                    | Organismal Systems                                                                                 |
| 91-100 years old | turquoise | F2        | 50.781       | coagulation factor II, thrombin                           | Human Diseases; Environmental Information Processing; Cellular Processes; Organismal Systems       |
|                  |           | FGG       | 48.344       | fibrinogen gamma chain                                    | Organismal Systems; Human Diseases                                                                 |

|          |         |                                                   |                                                                                              |
|----------|---------|---------------------------------------------------|----------------------------------------------------------------------------------------------|
| ITIH2    | 132.353 | inter-alpha-trypsin inhibitor heavy chain 2       | -                                                                                            |
| SERPINC1 | 58.881  | serpin family C member 1                          | Organismal Systems                                                                           |
| APOA2    | 48.962  | apolipoprotein A2                                 | Organismal Systems                                                                           |
| APOM     | 28.989  | apolipoprotein M                                  | -                                                                                            |
| FGB      | 45.765  | fibrinogen beta chain                             | Organismal Systems                                                                           |
| C1QB     | 28.621  | complement C1q B chain                            | Human Diseases; Organismal Systems                                                           |
| VSIG4    | 11.071  | V-set and immunoglobulin domain containing 4      | Organismal Systems                                                                           |
| EEF1B2   | 46.912  | eukaryotic translation elongation factor 1 beta 2 | -                                                                                            |
| F2       | 50.781  | coagulation factor II, thrombin                   | Human Diseases; Environmental Information Processing; Cellular Processes; Organismal Systems |
| TPT1     | 202.100 | tumor protein, translationally-controlled 1       | -                                                                                            |
| FETUB    | 19.827  | fetuin B                                          | -                                                                                            |

---
